# Supplementary material for: NHC catalysed trimethylsilylation of terminal alkynes and indoles with Ruppert's reagent under solvent free conditions
Source: Royal Society of Chemistry journal article supplement (doi:10.1039/c4ra08727e), 2014-01-01

*Supporting Information for*

**“N-Heterocyclic Carbene Catalysed Trimethylsilylation of  
Terminal Acetylenes and Indoles with Ruppert’s Reagent  
under Solvent Free Conditions”**

**Panjab Arde, Virsinha Reddy and R Vijaya Anand\***

*Indian Institute of Science Education and Research (IISER) Mohali, Sector 81, S A S Nagar,*

*Manuali (PO). Punjab - 140 306, India*

*E-mail: rvijayan@iisermohali.ac.in*

***Table of Contents***

|                                                                                                |         |
|------------------------------------------------------------------------------------------------|---------|
| 1. General Methods.....                                                                        | G2      |
| 2. General procedure for the Trimethylsilylation of terminal acetylenes.....                   | G2      |
| 3. Optimisation table with different silyl pronucleophiles.....                                | G3      |
| 4. Optimisation table for the silylation of indoles.....                                       | G3      |
| 5. Characterisation of products ( <b>10a – 10x</b> ).....                                      | G4-G10  |
| 6. General procedure for the N-silylation of indoles.....                                      | G10     |
| 7. Characterisation of products ( <b>12a – 12i</b> ).....                                      | G10-G12 |
| 8. Procedure for regeneration of Me <sub>3</sub> SiCF <sub>3</sub> from CHF <sub>3</sub> ..... | G13     |
| 9. <sup>29</sup> Si Spectrum of the reaction mixture.....                                      | G13     |
| 10. <sup>19</sup> F Spectrum of the reaction mixture.....                                      | G14     |
| 11. References.....                                                                            | G14     |
| 12. <sup>1</sup> H and <sup>13</sup> C NMR spectra of <b>3</b> .....                           | G15     |
| 13. <sup>1</sup> H and <sup>13</sup> C NMR spectra of <b>10a – 10x</b> .....                   | G16-G39 |
| 14. <sup>1</sup> H and <sup>13</sup> C NMR spectra of <b>12a – 12i</b> .....                   | G40-G47 |
| 15. <sup>19</sup> F Spectrum the reaction mixture (entry 4 in Table 1) .....                   | G48     |

**General Methods:** All reactions were carried out under Argon atmosphere. All the reagents including *N*-heterocyclic carbene precursors used were purchased from commercial sources and used as such.  $^1\text{H}$ ,  $^{13}\text{C}$ ,  $^{19}\text{F}$  and  $^{29}\text{Si}$  NMR spectra were recorded in  $\text{CDCl}_3$  using 400 MHz Bruker FT-NMR spectrometer. Chemical shifts values are reported in parts per million relative to TMS and  $\text{BF}_3\text{Et}_2\text{O}$ . High-resolution mass spectroscopy was performed on a Waters Q-TOF Premier-HAB213 spectrometer. FTIR spectra were recorded on a Bruker FTIR spectrometer equipped with a PIKE MIRacle ATR and Perkin Elmer FTIR spectrometer. Thin layer chromatography was performed on Merck Silica gel 60 F<sub>254</sub> TLC plates using Hexane/EtOAc mixture as an eluent. Column chromatography was carried out through silica gel (100-200 mesh) and neutral alumina.

**General procedure for the silylation of terminal acetylenes:** Trifluoromethyl trimethylsilane (0.45 mmol) was added to a mixture of **5** (0.006 mmol), Sodium hydride (0.015 mmol) and terminal acetylene (0.3 mmol) and the resulting suspension was stirred for few minutes at room temperature until the terminal acetylene was completely consumed. The reaction mixture was diluted with hexane (2 mL) and passed through a silica gel column at ambient temperature. Removal of volatiles under vacuum furnished the pure trimethylsilyl acetylene derivative.

**Table 1** Optimisation with different silyl pronucleophiles

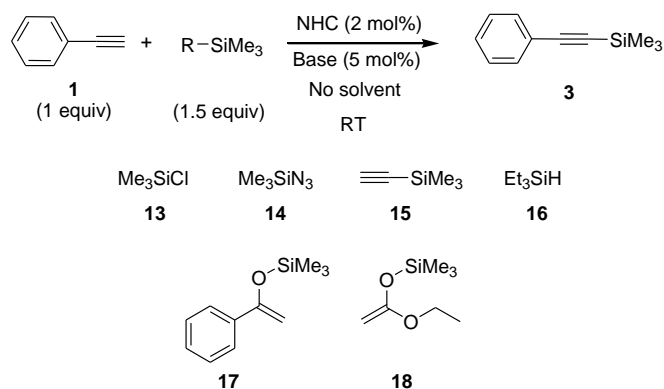

| S. No | Catalyst | Me <sub>3</sub> SiR | Base | Solvent | Time [h] | Yield [%] <sup>a</sup> |
|-------|----------|---------------------|------|---------|----------|------------------------|
| 1     | 5        | <b>13</b>           | NaH  | --      | 12       | --                     |
| 2     | 5        | <b>14</b>           | NaH  | --      | 12       | --                     |
| 3     | 5        | <b>15</b>           | NaH  | --      | 12       | --                     |
| 4     | 5        | <b>16</b>           | NaH  | --      | 12       | --                     |
| 5     | 5        | <b>16</b>           | NaH  | THF     | 12       | --                     |
| 6     | 5        | <b>17</b>           | NaH  | --      | 12       | --                     |
| 7     | 5        | <b>17</b>           | NaH  | THF     | 12       | --                     |
| 8     | 5        | <b>18</b>           | NaH  | --      | 12       | --                     |
| 9     | 5        | <b>18</b>           | NaH  | THF     | 12       | --                     |

<sup>a</sup> Isolated yield; RT = 31 - 33 °C

**Table 2** Optimisation table: Silylation of Indoles

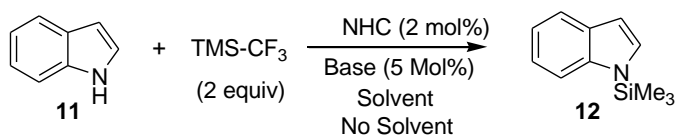

| S. No          | Catalyst | Base       | Solvent | Time [h] | Yield [%] <sup>a</sup> |
|----------------|----------|------------|---------|----------|------------------------|
| 1 <sup>b</sup> | 5        | NaH        | THF     | 12       | --                     |
| 2 <sup>b</sup> | 5        | NaH        | DMF     | 12       | --                     |
| 3 <sup>b</sup> | 5        | NaH        | Dioxane | 12       | --                     |
| <b>4</b>       | <b>5</b> | <b>NaH</b> | --      | <b>3</b> | <b>93</b>              |
| 5              | 5        | DBU        | --      | 6        | 9                      |
| 6              | 4        | NaH        | --      | 6        | 63                     |
| 7              | 6        | NaH        | --      | 6        | 75                     |
| 8              | 7        | NaH        | --      | 6        | 78                     |
| 9              | 8        | NaH        | --      | 6        | 17                     |

<sup>a</sup> Isolated yield; RT = 31 - 33 °C, <sup>b</sup> Reactions tried with 11h.

**Trimethyl(2-phenylethynyl)silane (3):**<sup>1</sup>

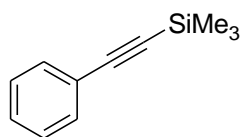

98% Yield. Colourless liquid; FT IR (ATR) = 2160,  $\text{cm}^{-1}$ ;  $^1\text{H}$  NMR (400 MHz,  $\text{CDCl}_3$ )  $\delta$  7.51 – 7.49 (m, 2H), 7.35 – 7.31 (m, 3H), -0.29 (s, 9H);  $^{13}\text{C}$  NMR (100 MHz,  $\text{CDCl}_3$ )  $\delta$  132.0, 128.5, 128.2, 123.2, 105.2, 94.1, 0.01.

**Trimethyl(2-*p*-tolylethynyl)silane (10a):**<sup>1</sup>

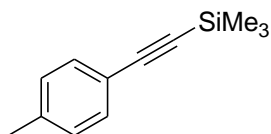

97% Yield. Colourless liquid; FT IR (ATR) = 2151  $\text{cm}^{-1}$ ;  $^1\text{H}$  NMR (400 MHz,  $\text{CDCl}_3$ )  $\delta$  7.32 (d,  $J$  = 8.1 Hz, 2H), 7.05 (d,  $J$  = 8.1 Hz, 2H), 2.31 (s, 3H), 0.21 (s, 9H);  $^{13}\text{C}$  NMR (100 MHz,  $\text{CDCl}_3$ )  $\delta$  138.6, 131.9, 128.9, 120.1, 105.4, 93.2, 21.5, 0.05.

**(2-(4-methoxyphenyl)ethynyl)trimethylsilane (10b):**<sup>1</sup>

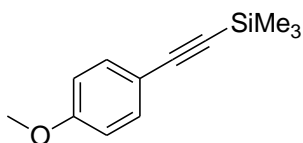

99% Yield. Colourless liquid; FT IR (ATR) = 2155  $\text{cm}^{-1}$ ;  $^1\text{H}$  NMR (400 MHz,  $\text{CDCl}_3$ )  $\delta$  7.30 (d,  $J$  = 8.8 Hz, 2H), 6.84 (d,  $J$  = 8.8 Hz, 2H), 3.83 (s, 3H), 0.26 (s, 9H);  $^{13}\text{C}$  NMR (100 MHz,  $\text{CDCl}_3$ )  $\delta$  159.7, 133.5, 115.2, 113.8, 105.2, 92.4, 55.3, 0.08.

**(2-(4-methoxy-2-methylphenyl)ethynyl)trimethylsilane (10c):**

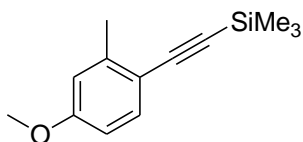

99% Yield. Light yellow liquid; FT IR (ATR) = 2148  $\text{cm}^{-1}$ ;  $^1\text{H}$  NMR (400 MHz,  $\text{CDCl}_3$ )  $\delta$  7.38 (d,  $J$  = 8.5 Hz, 1H), 6.75 (d,  $J$  = 2.3 Hz, 1H), 6.68 (dd,  $J$  = 8.5, 2.3 Hz, 1H), 3.81 (s, 3H) 2.44 (s, 3H), 0.27 (s, 9H);  $^{13}\text{C}$  NMR (100 MHz,  $\text{CDCl}_3$ )  $\delta$  159.6, 142.5, 133.5, 115.2, 114.9, 111.1, 104.2, 96.4, 55.2, 20.9, 0.17; HRMS (ESI):  $m/z$  calcd for  $\text{C}_{13}\text{H}_{18}\text{OSi}$  218.1127; found 218.1125.

***N,N*-dimethyl-4-(2-(trimethylsilyl)ethynyl)benzenamine (10d):**<sup>2</sup>

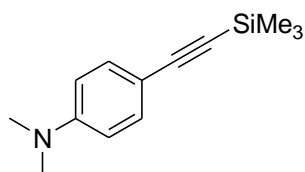

90% Yield. Brown solid; mp 87 – 90 °C; FT IR (ATR) = 2140  $\text{cm}^{-1}$ ;  $^1\text{H}$  NMR (400 MHz,  $\text{CDCl}_3$ )  $\delta$  7.33 (d,  $J$  = 8.8 Hz, 2H), 6.58 (d,  $J$  = 8.9 Hz, 2H), 2.96 (s, 6H), 0.23 (s, 9H);  $^{13}\text{C}$  NMR (100 MHz,  $\text{CDCl}_3$ )  $\delta$  150.2, 133.1, 111.7, 109.8, 106.5, 91.2, 40.2, 0.24.

**Trimethyl(2-(4-pentylphenyl)ethynyl)silane (10e):**

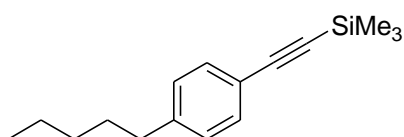

99% Yield. Colourless liquid; FT IR (ATR) = 2158  $\text{cm}^{-1}$ ;  $^1\text{H}$  NMR (400 MHz,  $\text{CDCl}_3$ )  $\delta$  7.40 (d,  $J$  = 8.3 Hz, 2H), 7.13 (d,  $J$  = 8.4 Hz, 2H), 2.61 (t,  $J$  = 7.6 Hz, 2H), 1.65 – 1.58 (m, 2H), 1.38 – 1.28 (m, 4H), 0.91 (t,  $J$  = 6.7, 3H), 0.27 (s, 9H);  $^{13}\text{C}$  NMR (100 MHz,  $\text{CDCl}_3$ )  $\delta$  143.7, 131.9, 128.3, 120.2, 105.4, 93.3, 35.9, 31.4, 30.9, 22.5, 14.1, 0.06; HRMS (ESI):  $m/z$  calcd for  $\text{C}_{16}\text{H}_{24}\text{Si}$  244.1647; found 244.1647.

**Trimethyl(2-(2,4,5-trimethylphenyl)ethynyl)silane (10f):**

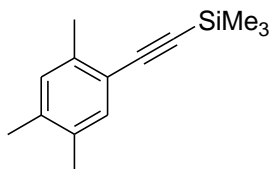

99% Yield. White solid; mp 57 – 59°C; FT IR (ATR) = 2147  $\text{cm}^{-1}$ ;  $^1\text{H}$  NMR (400 MHz,  $\text{CDCl}_3$ )  $\delta$  7.23 (s, 1H), 6.97 (s, 1H), 2.38 (s, 3H), 2.24 (s, 3H), 2.20 (s, 3H), 0.27 (s, 9H);  $^{13}\text{C}$  NMR (100 MHz,  $\text{CDCl}_3$ )  $\delta$  137.9, 137.3, 133.6, 133.1, 130.8, 120.0, 104.5, 96.9, 20.0, 19.7, 19.0, 0.15; HRMS (ESI):  $m/z$  calcd for  $\text{C}_{14}\text{H}_{20}\text{Si}$  216.1334; found 216.1338.

**(2-(4-bromophenyl)ethynyl)trimethylsilane (10g):<sup>3</sup>**

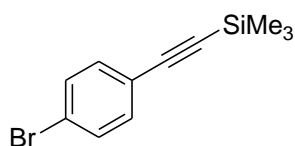

99% Yield. White solid; mp 64 – 66 °C; FT IR (ATR) = 2158 cm<sup>-1</sup>; <sup>1</sup>H NMR (400 MHz, CDCl<sub>3</sub>) δ 7.45 (d, *J* = 8.7 Hz, 2H), 7.34 (d, *J* = 8.7 Hz, 2H), 0.27 (s, 9H); <sup>13</sup>C NMR (100 MHz, CDCl<sub>3</sub>) δ 133.4, 131.5, 122.8, 122.1, 103.9, 95.6, -0.10.

***Trimethyl(2-(4-phenoxyphenyl)ethynyl)silane (10h):***

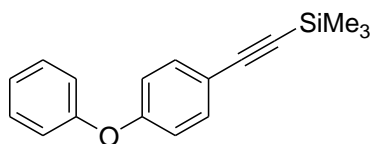

99% Yield. Light yellow liquid; FT IR (ATR) = 2157 cm<sup>-1</sup>; <sup>1</sup>H NMR (400 MHz, CDCl<sub>3</sub>) δ 7.44 (d, *J* = 8.8 Hz, 2H), 7.39 (t, *J* = 7.8 Hz, 2H), 7.17 (t, *J* = 7.6 Hz, 1H), 7.04 (d, *J* = 7.6 Hz, 2H), 6.94 (d, *J* = 8.7 Hz, 2H), 0.28 (s, 9H); <sup>13</sup>C NMR (100 MHz, CDCl<sub>3</sub>) δ 157.7, 156.4, 133.6, 129.9, 123.9, 119.4, 118.2, 117.7, 104.7, 93.4, 0.05; HRMS (ESI): *m/z* calcd for C<sub>17</sub>H<sub>18</sub>OSi 266.1127; found 266.1128.

***(2-(2-methoxynaphthalen-6-yl)ethynyl)trimethylsilane (10i):***<sup>4</sup>

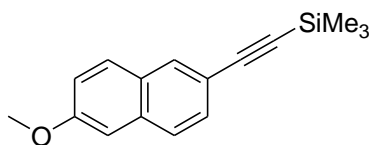

90% Yield. White solid; mp 105 – 107 °C; FT IR (ATR) = 2154 cm<sup>-1</sup>; <sup>1</sup>H NMR (400 MHz, CDCl<sub>3</sub>) δ 7.95 (s, 1H), 7.71 – 7.66 (m, 2H), 7.51 – 7.48 (m, 1H), 7.18 – 7.15 (m, 1H), 7.11 (d, *J* = 2.5 Hz, 1H), 3.94 (s, 3H), 0.30 (s, 9H); <sup>13</sup>C NMR (100 MHz, CDCl<sub>3</sub>) δ 158.4, 134.2, 131.9, 129.4, 129.2, 128.3, 126.7, 119.4, 118.0, 105.8, 105.7, 93.7, 55.4, 0.08.

***(2-(3,5-difluorophenyl)ethynyl)trimethylsilane (10j):***

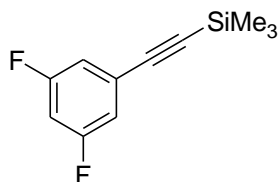

95% Yield. Yellow liquid; FT IR (ATR) = 2360 cm<sup>-1</sup>; <sup>1</sup>H NMR (400 MHz, CDCl<sub>3</sub>) δ 7.02–6.96 (m, 2H), 6.83 – 6.78 (m, 1H), 0.27 (s, 9H); <sup>13</sup>C NMR (100 MHz, CDCl<sub>3</sub>) δ 162.6 (dd, <sup>1</sup>*J*<sub>C-F</sub> = 247.2, 13.2 Hz, 2C), 125.8, 114.9 (d, *J*<sub>C-F</sub> = 26.2 Hz, 1C), 104.7 (t, *J*<sub>C-F</sub> = 25.5 Hz, 1C), 102.4, 96.8, -0.25; HRMS (ESI): *m/z* calcd for C<sub>11</sub>H<sub>12</sub>F<sub>2</sub>Si 210.0676; found 210.0677.

**Ethyl 3-(trimethylsilyl)propiolate (10k):**<sup>5</sup>

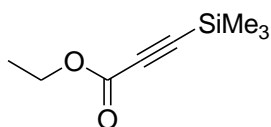

95% Yield. Colourless liquid; FT IR (ATR) = 2183, 1713  $\text{cm}^{-1}$ ;  $^1\text{H}$  NMR (400 MHz,  $\text{CDCl}_3$ )  $\delta$  4.22 (q,  $J = 7.1$ , Hz, 2H), 1.31 (t,  $J = 7.2$  Hz, 3H) 0.24 (s, 9H);  $^{13}\text{C}$  NMR (100 MHz,  $\text{CDCl}_3$ )  $\delta$  153.0, 94.7, 93.6, 62.0, 14.0, -0.88.

**4-(2-(trimethylsilyl)ethynyl)benzonitrile (10l):**<sup>1</sup>

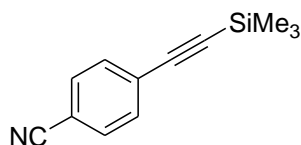

99% Yield. White solid; mp 102–104  $^{\circ}\text{C}$ ; FT IR (ATR) = 2234, 2157  $\text{cm}^{-1}$ ;  $^1\text{H}$  NMR (400 MHz,  $\text{CDCl}_3$ )  $\delta$  7.61 (d,  $J = 8.6$  Hz, 2H), 7.55 (d,  $J = 8.7$  Hz, 2H) 0.28 (s, 9H);  $^{13}\text{C}$  NMR (100 MHz,  $\text{CDCl}_3$ )  $\delta$  132.5, 131.9, 118.5, 111.8, 103.0, 99.6, 92.3, -0.26.

**(2-(3-fluorophenyl)ethynyl)trimethylsilane (10m):**

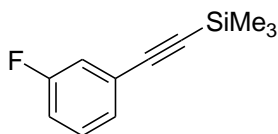

99% Yield. Yellow liquid; FT IR (ATR) = 2190  $\text{cm}^{-1}$ ;  $^1\text{H}$  NMR (400 MHz,  $\text{CDCl}_3$ )  $\delta$  7.31 – 7.25 (m, 2H), 7.20 – 7.16 (m, 1H), 7.07 – 7.02 (m, 1H), 0.28 (s, 9H);  $^{13}\text{C}$  NMR (100 MHz,  $\text{CDCl}_3$ )  $\delta$  162.2 (d,  $^1J_{\text{C-F}} = 245.0$  Hz, 1C), 129.8 (d,  $J_{\text{C-F}} = 8.8$  Hz, 1C), 127.8 (d,  $J_{\text{C-F}} = 3.0$  Hz, 1C), 124.9 (d,  $J_{\text{C-F}} = 9.5$  Hz, 1C), 118.8 (d,  $J_{\text{C-F}} = 22.6$  Hz, 1C), 115.8 (d,  $J_{\text{C-F}} = 21.0$  Hz, 1C), 103.6 (d,  $J_{\text{C-F}} = 3.7$  Hz, 1C), 95.4, -0.12; HRMS (ESI):  $m/z$  calcd for  $\text{C}_{11}\text{H}_{13}\text{FSi}$  192.0771; found 192.0770.

**(3-(4-phenylphenoxy)prop-1-ynyl)trimethylsilane (10n):**

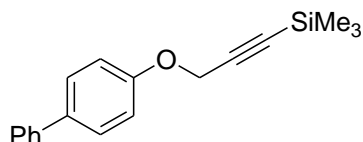

99% Yield. White solid; mp 65 – 67  $^{\circ}\text{C}$ ; FT IR (ATR) = 2174  $\text{cm}^{-1}$ ;  $^1\text{H}$  NMR (400 MHz,  $\text{CDCl}_3$ )  $\delta$  7.60 – 7.55 (m, 4H), 7.47 – 7.43 (m, 2H), 7.36 – 7.32 (m, 1H), 7.08 (d,  $J = 8.8$  Hz, 2H), 4.74 (s, 2H), 0.21 (s, 9H);  $^{13}\text{C}$  NMR (100 MHz,  $\text{CDCl}_3$ )  $\delta$  157.4,

148.1, 140.7, 134.5, 128.8, 128.1, 126.8, 115.3, 100.0, 92.9, 56.9, -0.26; HRMS (ESI):  $m/z$  calcd for  $C_{11}H_{13}FSi$  280.1283; found 280.1287.

***3-(2,4-dichlorophenoxy)prop-1-ynyltrimethylsilane (10o):***

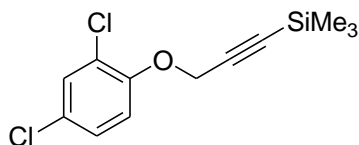

99% Yield. White solid; mp 68 – 70 °C; FT IR (ATR) = 2170  $cm^{-1}$ ;  $^1H$  NMR (400 MHz,  $CDCl_3$ )  $\delta$  7.40 (d,  $J$  = 2.5 Hz, 1H), 7.21 (dd,  $J$  = 8.8, 2.5 Hz, 1H), 7.05 (d,  $J$  = 8.8 Hz, 1H), 4.76 (s, 2H), 0.18 (s, 9H);  $^{13}C$  NMR (100 MHz,  $CDCl_3$ )  $\delta$  152.1, 130.1, 127.4, 126.7, 124.2, 115.6, 99.0, 94.1, 58.1, -0.37.

***1-(3-(trimethylsilyl)prop-2-ynyl)pyrrolidine (10p):***<sup>6</sup>

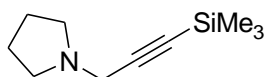

96% Yield. Yellow liquid; FT IR (ATR) = 2167  $cm^{-1}$ ;  $^1H$  NMR (400 MHz,  $CDCl_3$ )  $\delta$  3.42 (s, 2H), 2.63 – 2.60 (m, 4H), 1.83 – 1.80 (m, 4H), 0.17 (s, 9H);  $^{13}C$  NMR (100 MHz,  $CDCl_3$ )  $\delta$  101.9, 88.8, 52.6, 44.1, 23.7, 0.04.

***3-(trimethylsilyl)prop-2-ynyl acetate (10q):***<sup>1</sup>

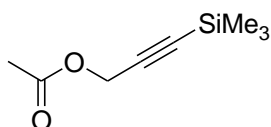

99% Yield. Colourless liquid; FT IR (ATR) = 2186, 1750  $cm^{-1}$ ;  $^1H$  NMR (400 MHz,  $CDCl_3$ )  $\delta$  4.69 (s, 2H), 2.13 (s, 3H) 0.20 (s, 9H);  $^{13}C$  NMR (100 MHz,  $CDCl_3$ )  $\delta$  170.3, 98.9, 92.1, 52.8, 20.8, -0.30.

***3-(trimethylsilyl)-N-tosylprop-2-yn-1-amine (10r):***

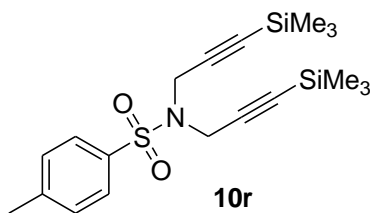

99% Yield. Light yellow solid; mp 59 – 61 °C; FT IR (ATR) = 2174  $cm^{-1}$ ;  $^1H$  NMR (400 MHz,  $CDCl_3$ )  $\delta$  7.72 (d,  $J$  = 8.3 Hz, 2H), 7.30 (d,  $J$  = 8.5 Hz, 2H), 4.17 (s, 4H),



2.44 (s, 3H), 0.08 (s, 18H);  $^{13}\text{C}$  NMR (100 MHz,  $\text{CDCl}_3$ )  $\delta$  143.7, 135.4, 129.6, 127.9, 97.7, 91.0, 37.2, 21.6, -0.34; HRMS (ESI):  $m/z$  calcd for  $\text{C}_{19}\text{H}_{29}\text{NO}_2\text{SSi}_2\text{H}$  392.1536; found 392.1540.

**1-(3-(trimethylsilyl)prop-2-ynyl)-1H-indole (10s):**

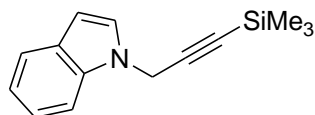

99% Yield. Yellow liquid; FT IR (ATR) = 2181  $\text{cm}^{-1}$ ;  $^1\text{H}$  NMR (400 MHz,  $\text{CDCl}_3$ )  $\delta$  7.69 – 7.67 (m, 1H), 7.45 – 7.43 (m, 1H), 7.30 – 7.26 (m, 2H), 7.19 – 7.15 (m, 1H), 6.57 – 6.56 (m, 1H), 4.92 (s, 2H), 0.21 (s, 9H);  $^{13}\text{C}$  NMR (100 MHz,  $\text{CDCl}_3$ )  $\delta$  135.8, 128.8, 127.2, 121.7, 121.0, 119.7, 109.4, 101.8, 99.1, 90.7, 36.8, -0.22.

**2-(3-(trimethylsilyl)prop-2-ynyl)isoindoline (10t):**

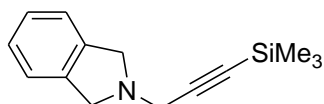

95% Yield. Light brown liquid; FT IR (ATR) = 2158,  $\text{cm}^{-1}$ ;  $^1\text{H}$  NMR (400 MHz,  $\text{CDCl}_3$ )  $\delta$  7.25 – 7.21 (m, 4H), 4.08 (s, 4H), 3.67 (s, 2H) 0.18 (s, 9H);  $^{13}\text{C}$  NMR (100 MHz,  $\text{CDCl}_3$ )  $\delta$  140.0, 126.8, 122.4, 101.2, 90.8, 57.3, 43.8, 0.03.

**1,2,3,4-tetrahydro-2-(3-(trimethylsilyl)prop-2-ynyl)isoquinoline (10u):**

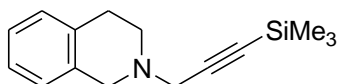

93% Yield. Yellow liquid; FT IR (ATR) = 2163  $\text{cm}^{-1}$ ;  $^1\text{H}$  NMR (400 MHz,  $\text{CDCl}_3$ )  $\delta$  7.18 – 7.07 (m, 4H), 3.80 (s, 2H), 3.56 (s, 2H), 2.98 (t,  $J$  = 6.0 Hz, 2H), 2.86 (t,  $J$  = 6.0 Hz, 2H), 0.20 (s, 9H);  $^{13}\text{C}$  NMR (100 MHz,  $\text{CDCl}_3$ )  $\delta$  134.4, 133.7, 128.7, 126.6, 126.2, 125.7, 100.4, 90.4, 54.2, 49.6, 47.7, 29.1, 0.04.

**2-(2-(trimethylsilyl)ethynyl)pyridine (10v):<sup>7</sup>**

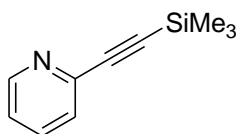

90% Yield. Yellow liquid; FT IR (ATR) = 2166  $\text{cm}^{-1}$ ;  $^1\text{H}$  NMR (400 MHz,  $\text{CDCl}_3$ )  $\delta$  8.59 – 8.57 (m, 1H), 7.67 – 7.63 (m, 1H), 7.48 – 7.45 (m, 1H), 7.29 – 7.22 (m, 1H),

0.28 (s, 9H);  $^{13}\text{C}$  NMR (100 MHz,  $\text{CDCl}_3$ )  $\delta$  149.9, 143.0, 136.1, 127.3, 123.1, 103.6, 94.8, -0.27.

**Trimethyl(2-(thiophen-3-yl)ethynyl)silane (10w):**<sup>7</sup>

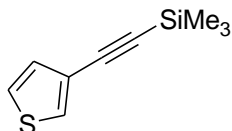

99% Yield. Yellow liquid; FT IR (ATR) = 2154,  $\text{cm}^{-1}$ ;  $^1\text{H}$  NMR (400 MHz,  $\text{CDCl}_3$ )  $\delta$  7.51 (dd,  $J = 3.0, 1.2$  Hz, 1H), 7.26 (dd,  $J = 5.0, 3.0$  Hz, 1H), 7.15 (dd,  $J = 5.0, 1.1$  Hz, 1H), 0.27 (s, 9H);  $^{13}\text{C}$  NMR (100 MHz,  $\text{CDCl}_3$ )  $\delta$  130.1, 129.6, 125.2, 122.3, 99.9, 93.9, -0.28.

**Trimethyl(2-(pyren-4-yl)ethynyl)silane (10x):**<sup>8</sup>

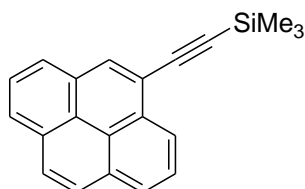

90% Yield. Yellow solid, mp 104 – 106  $^\circ\text{C}$ ; FT IR (ATR) = 2150  $\text{cm}^{-1}$ ;  $^1\text{H}$  NMR (400 MHz,  $\text{CDCl}_3$ )  $\delta$  8.60 (d,  $J = 9.1$  Hz, 1H), 8.25 – 8.18 (m, 4H), 8.11 – 8.02 (m, 4H), 0.46 (s, 9H);  $^{13}\text{C}$  NMR (100 MHz,  $\text{CDCl}_3$ )  $\delta$  132.3, 131.4, 131.2, 131.0, 129.9, 128.4, 128.2, 127.2, 126.2, 125.7, 125.6, 125.5, 124.4, 124.3, 124.2, 117.6, 104.2, 100.2, 0.28.

**General procedure for the silylation of indoles:** Trifluoromethyl trimethylsilane (0.7 mmol) was added to a mixture of **5** (0.007 mmol), Sodium hydride (0.017 mmol) and indole (0.35 mmol) and the resulting suspension was stirred for few minutes at room temperature until the indole was completely consumed. The reaction mixture was diluted with hexane (2 mL) and passed through a neutral alumina column at ambient temperature. Removal of volatiles under vacuum furnished the pure trimethylsilyl indole derivative.

**1-(trimethylsilyl)-1H-indole (12a):**<sup>9</sup>

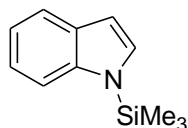

93% Yield. Colourless liquid; FT IR = 2959, 1452  $\text{cm}^{-1}$ ;  $^1\text{H}$  NMR (400 MHz,  $\text{CDCl}_3$ )  $\delta$  7.73 – 7.70 (m, 1H), 7.58–7.54 (m, 1H), 7.27 – 7.17 (m, 3H), 6.66 (d,  $J$  = 3.2 Hz, 1H), 0.60 (s, 9H);  $^{13}\text{C}$  NMR (100 MHz,  $\text{CDCl}_3$ )  $\delta$  140.2, 131.6, 129.9, 121.4, 120.9, 119.9, 112.9, 104.6, -0.06.

**2-methyl-1-(trimethylsilyl)-1H-indole (12b):**

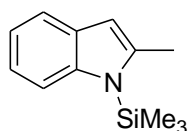

96% Yield. Colourless liquid; FT IR = 2958, 1455  $\text{cm}^{-1}$ ;  $^1\text{H}$  NMR (400 MHz,  $\text{CDCl}_3$ )  $\delta$  7.60 – 7.57 (m, 2H), 7.19–7.16 (m, 2H), 6.40 (s, 1H), 2.56 (d,  $J$  = 1.0 Hz, 3H) 0.68 (s, 9H);  $^{13}\text{C}$  NMR (100 MHz,  $\text{CDCl}_3$ )  $\delta$  141.7, 141.4, 131.5, 120.5, 119.8, 119.5, 113.1, 105.6, 17.1, 2.33.

**3-methyl-1-(trimethylsilyl)-1H-indole (12c):**

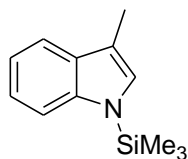

97% Yield. Colourless liquid; FT IR = 2958, 1452  $\text{cm}^{-1}$ ;  $^1\text{H}$  NMR (400 MHz,  $\text{CDCl}_3$ )  $\delta$  7.66 (d,  $J$  = 8.2 Hz, 1H), 7.54 (d,  $J$  = 8.4 Hz, 1H), 7.27 – 7.23 (m, 2H), 7.02 (s, 1H), 2.40 (s, 3H), 0.60 (s, 9H);  $^{13}\text{C}$  NMR (100 MHz,  $\text{CDCl}_3$ )  $\delta$  140.6, 132.0, 127.2, 121.4, 119.3, 119.1, 113.5, 112.9, 9.7, 0.04.

**5-bromo-1-(trimethylsilyl)-1H-indole (12d):**

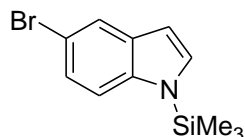

51% Yield. Yellow liquid; FT IR = 2958, 1444  $\text{cm}^{-1}$ ;  $^1\text{H}$  NMR (400 MHz,  $\text{CDCl}_3$ )  $\delta$  7.79 (d,  $J$  = 2.0 Hz, 1H), 7.398 – 7.36 (m, 1H), 7.29 – 7.26 (m, 1H), 7.19 (d,  $J$  = 3.2 Hz, 1H), 6.55 (d,  $J$  = 3.2 Hz, 1H), 0.56 (s, 9H);  $^{13}\text{C}$  NMR (100 MHz,  $\text{CDCl}_3$ )  $\delta$  138.8, 133.6, 131.1, 124.2, 123.3, 114.2, 113.3, 104.1, -0.15.

**7-ethyl-1-(trimethylsilyl)-1H-indole (12e) :**

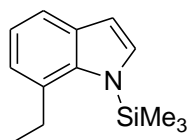

90% Yield. Colourless liquid; FT IR = 2965, 1413  $\text{cm}^{-1}$ ;  $^1\text{H}$  NMR (400 MHz,  $\text{CDCl}_3$ )  $\delta$  7.59 – 7.55 (m, 1H), 7.33 (d,  $J$  = 3.3 Hz, 1H), 7.23 – 7.09 (m, 2H), 6.66 (d,  $J$  = 3.3 Hz, 1H), 3.14 (q,  $J$  = 7.4 Hz, 2H), 1.41 (t,  $J$  = 7.4 Hz, 3H), 0.65 (s, 9H);  $^{13}\text{C}$  NMR (100 MHz,  $\text{CDCl}_3$ )  $\delta$  139.2, 132.9, 131.8, 128.8, 122.0, 120.7, 118.4, 105.0, 26.0, 15.9, 2.68.

**2-(1-(trimethylsilyl)-1H-indol-3-yl)acetonitrile (12f):**

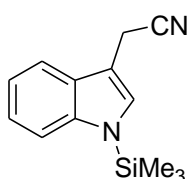

65% Yield. Colourless liquid; FT IR = 2959, 2254, 1455  $\text{cm}^{-1}$ ;  $^1\text{H}$  NMR (400 MHz,  $\text{CDCl}_3$ )  $\delta$  7.66 (d,  $J$  = 8.2 Hz, 1H), 7.54 (d,  $J$  = 8.4 Hz, 1H), 7.27 – 7.23 (m, 2H), 7.02 (s, 1H), 3.85 (s, 3H), 0.60 (s, 9H);  $^{13}\text{C}$  NMR (100 MHz,  $\text{CDCl}_3$ )  $\delta$  140.6, 129.5, 128.4, 122.3, 120.3, 118.3, 118.2, 113.3, 106.4, 14.4, -0.08.

**6-chloro-1-(trimethylsilyl)-1H-indole (12g):**

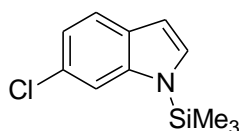

95% Yield. Colourless liquid; FT IR = 2961, 1460  $\text{cm}^{-1}$ ;  $^1\text{H}$  NMR (400 MHz,  $\text{CDCl}_3$ )  $\delta$  7.59 (d,  $J$  = 8.4 Hz, 1H), 7.50 (s, 1H), 7.20 (d,  $J$  = 3.2 Hz, 1H), 7.16 – 7.13 (m, 1H), 6.61 (d,  $J$  = 8.4 Hz, 1H), 0.59 (s, 1H);  $^{13}\text{C}$  NMR (100 MHz,  $\text{CDCl}_3$ )  $\delta$  140.6, 130.6, 130.1, 127.3, 121.5, 120.6, 112.8, 104.6, -0.10.

**1-(trimethylsilyl)-1H-pyrrole (12i):<sup>9</sup>**

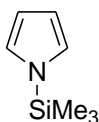

76% Yield. Colourless liquid; FT IR = 2960, 1472  $\text{cm}^{-1}$ ;  $^1\text{H}$  NMR (400 MHz,  $\text{CDCl}_3$ )  $\delta$ , 6.87 (t,  $J$  = 2.0 Hz, 2H), 6.39 (t,  $J$  = 2.0 Hz, 2H), 0.47 (s, 9H);  $^{13}\text{C}$  NMR (100 MHz,  $\text{CDCl}_3$ )  $\delta$  123.0, 110.8, -0.26.

**Procedure for the regeneration of  $\text{Me}_3\text{SiCF}_3$  from  $\text{CHF}_3$ :**<sup>10</sup> Trifluoromethyl trimethylsilane (490  $\mu\text{L}$ , 3.3 mmol) was added to a mixture of **5** (20.0 mg, 0.044 mmol), Sodium hydride [8.0 mg (55% suspension in mineral oil), 0.11 mmol] and phenylacetylene (490  $\mu\text{L}$ , 2.2 mmol) and the resulting suspension was stirred for few minutes at room temperature. During the reaction  $\text{CHF}_3$  (approx. 2.2 mmol) was generated. It was passed through cannula to another reaction flask containing potassium hexamethyldisilazide [0.5 M in toluene] (0.2 mL, 1 mmol) and chlorotrimethylsilane (108  $\mu\text{L}$ , 1 mmol) at  $-85^\circ\text{C}$  for 30 minutes. Resulting mixture was stirred vigorously at  $-85^\circ\text{C}$  for 5 hours. The reaction mixture was then slowly warmed to room temperature and stirred for 3 hours. *o*-Fluoro nitrobenzene (45 mg, 0.32 mmol) was added as an internal standard to the crude mixture and it was analysed by  $^{29}\text{Si}$  and  $^{19}\text{F}$  NMR (Figure 1). Yield 58% (by  $^{19}\text{F}$  NMR);  $^{19}\text{F}$  NMR (376.5 MHz,  $\text{CDCl}_3$ )  $\delta$  -66.6 (s);  $^{29}\text{Si}$  NMR (79.5 MHz,  $\text{CDCl}_3$ )  $\delta$  4.22 (q,  $J_{\text{Si-F}} = 38.0$  Hz, 1Si).

**Figure 1:**

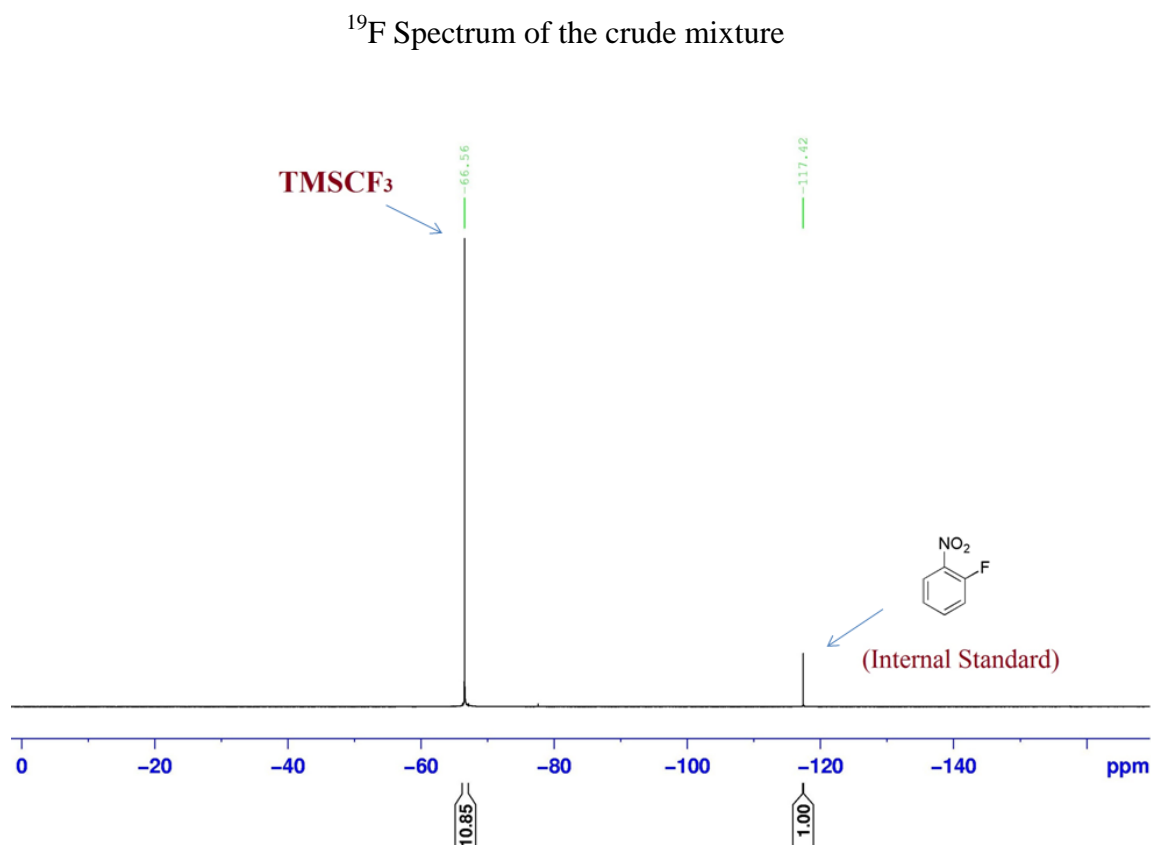

## $^{29}\text{Si}$ Spectrum of the crude mixture

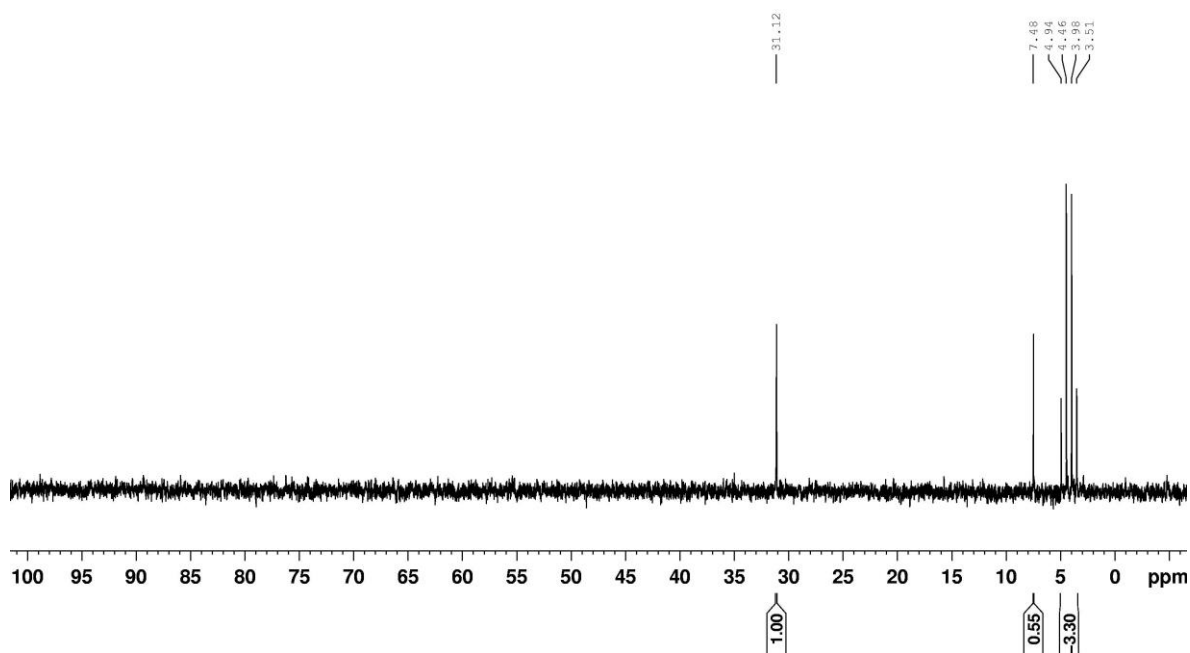

### References:

- 1) A. A. Andreev,; V. V. Konshin,; N. V. Komarov,; M. Rubin,; C. Brouwer,; V. Gevorgyan, *Org. Lett.*, 2004, **6**, 421.
- 2) A. Elangovan,; Y. H. Wang,; T. Ho, *Org. Lett.*, 2003, **5**, 1841.
- 3) R. J. Rahaim,; Jr.; J. T. Shaw, *J. Org. Chem.* 2008, **73**, 2912.
- 4) Y. Arakawa,; H. Furuya,; G. Konishi, *Poym. Bull.* 2013, **70**, 47.
- 5) A. H. Khuthier,; M. A. Sheat,; Al-Rawi,; M. A. Jasim,; S. Zuhair, *J. Chem. Res. Synop.* 1987, **6**, 184.
- 6) F. Kloss,; U. Köhn,; B. O. Jahn,; M. D. Hager,; H. Görls,; U. S. Schubert, *Chem. Asian J.* 2011, **6**, 2816.
- 7) M. Erdelyi,; A. Gogoll, *J. Org. Chem.* 2001, **66**, 4165.
- 8) M. Kanai,; T. Hirano,; I. Azumaya,; I. Okamoto,; H. Kagechika,; A. Tanatani, *Tetrahedron*, 2012, **68**, 2778.
- 9) C. J. Smith,; M. W. S. Tsang,; A. B. Holmes,; R. L. Danheiser,; J. W. Tester, *Org. Biomol. Chem.* 2005, **3**, 3767.
- 10) G. K. Prakash, P. V. Jog, P. T. D. Batamack, G. A. Olah, *Science* 2012, **338**, 1324.

# $^1\text{H}$ NMR Spectrum of **3**

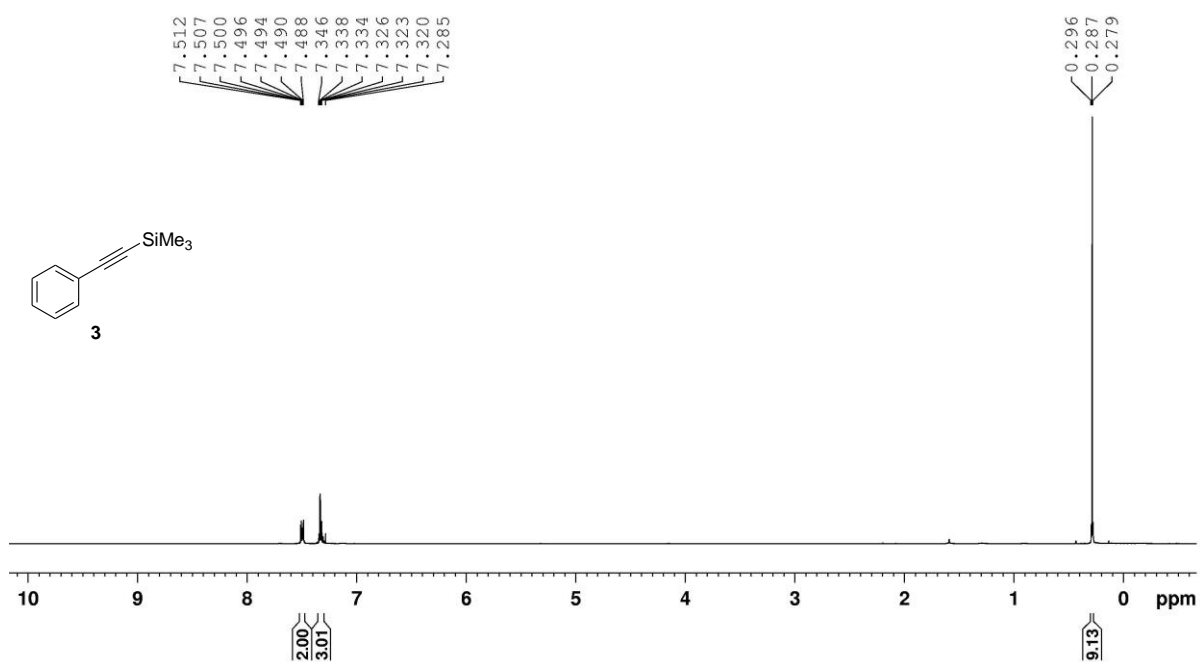

# $^{13}\text{C}$ NMR Spectrum of **3**

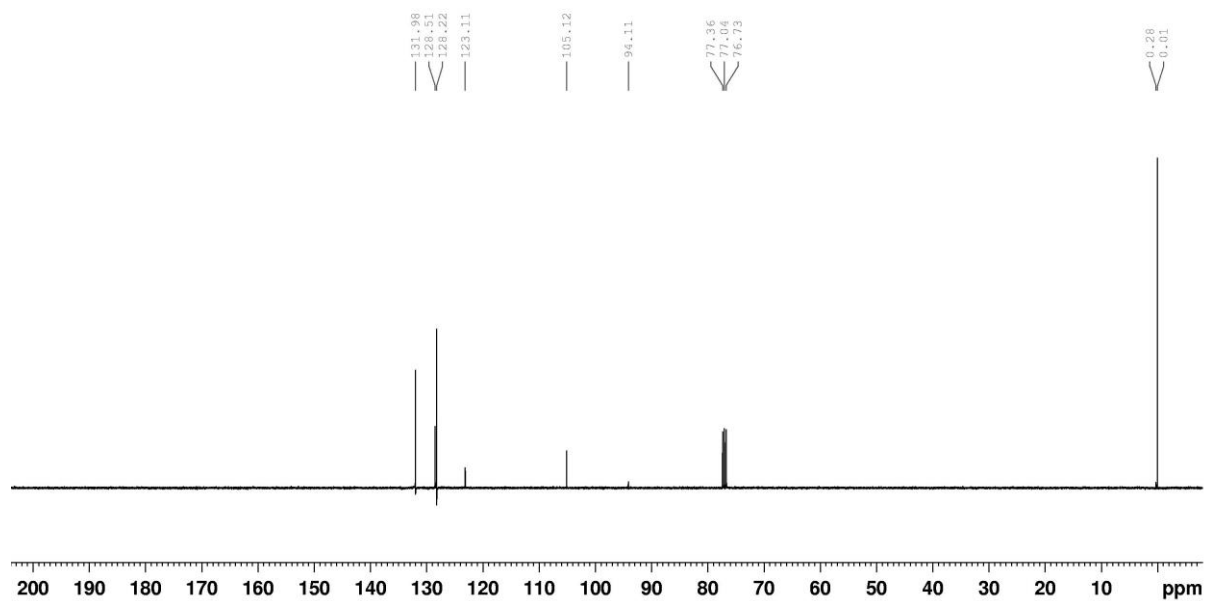

# <sup>1</sup>H NMR Spectrum of 10a

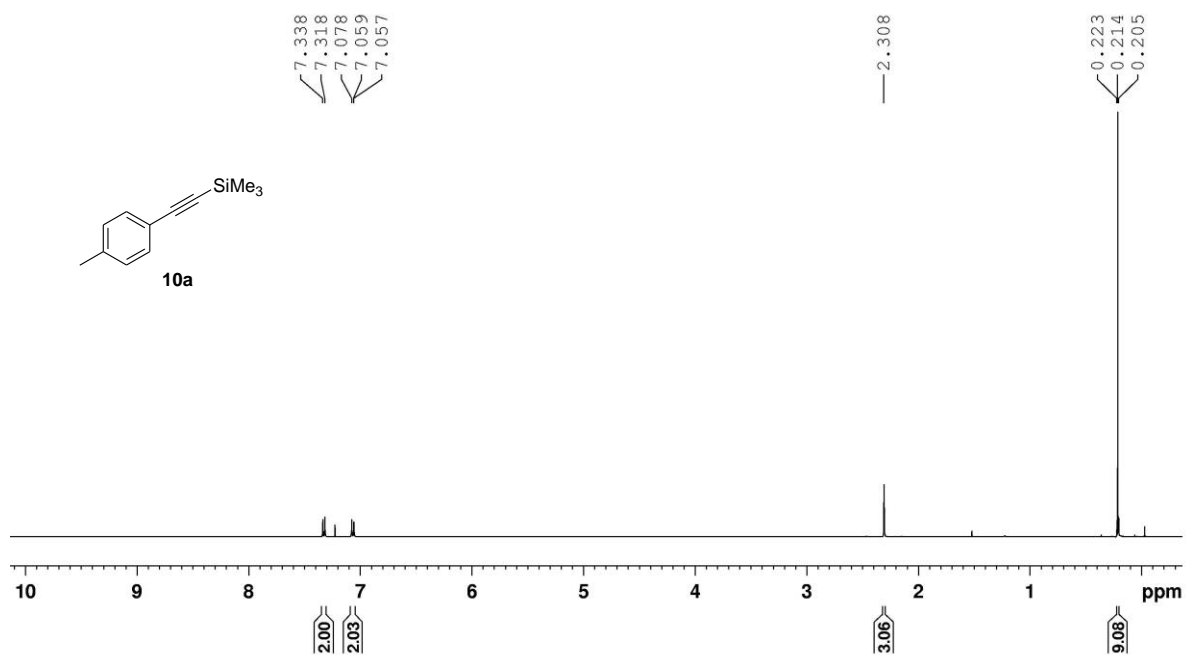

# <sup>13</sup>C NMR Spectrum of 10a

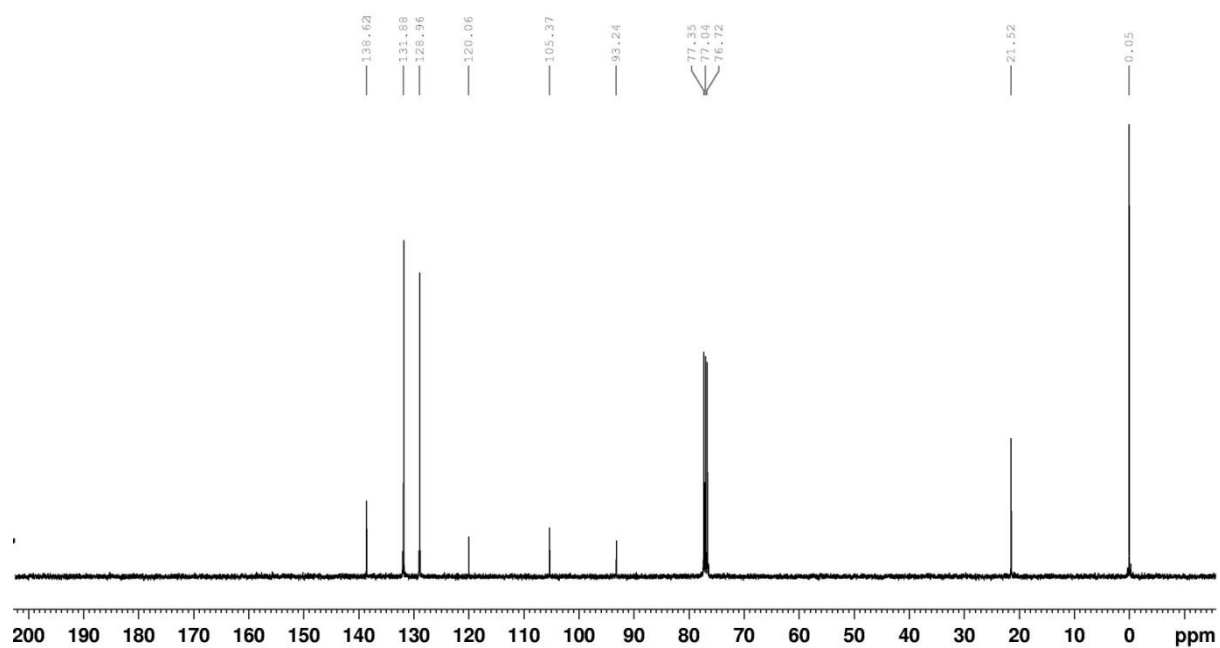



# <sup>1</sup>H NMR Spectrum of **10b**

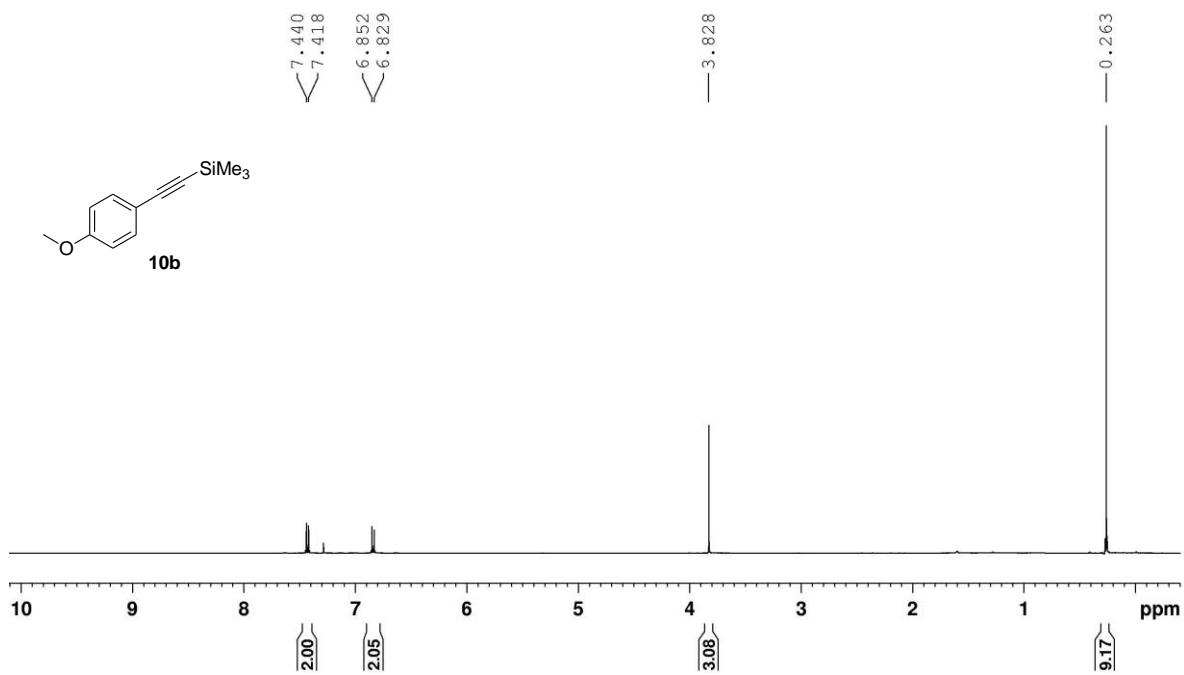

# <sup>13</sup>C NMR Spectrum of **10b**

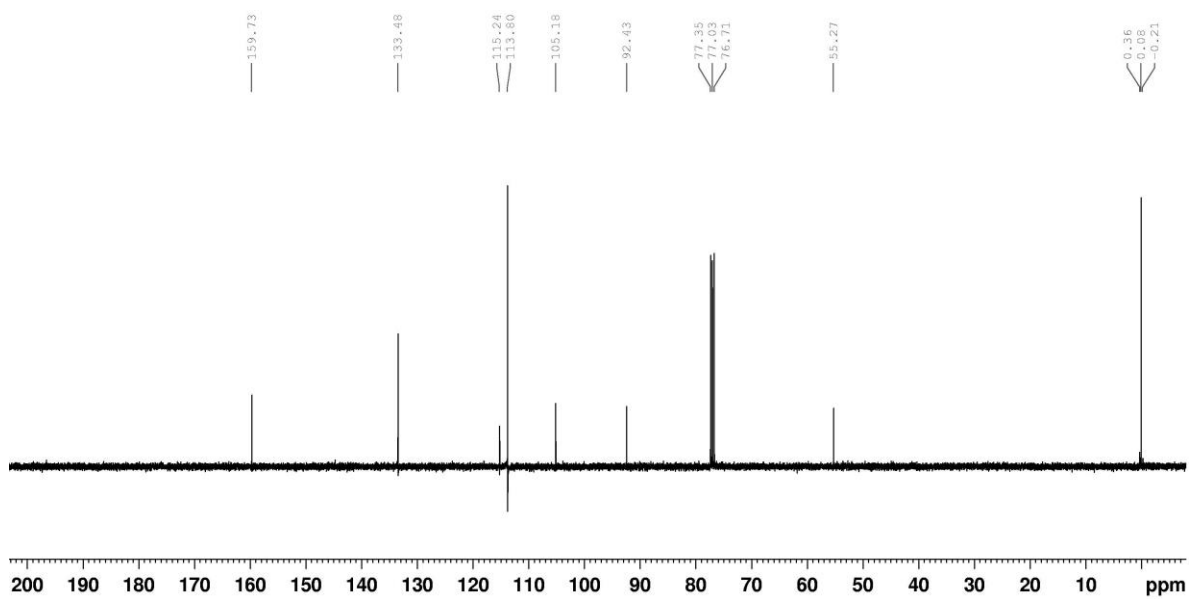

# $^1\text{H}$ NMR Spectrum of **10c**

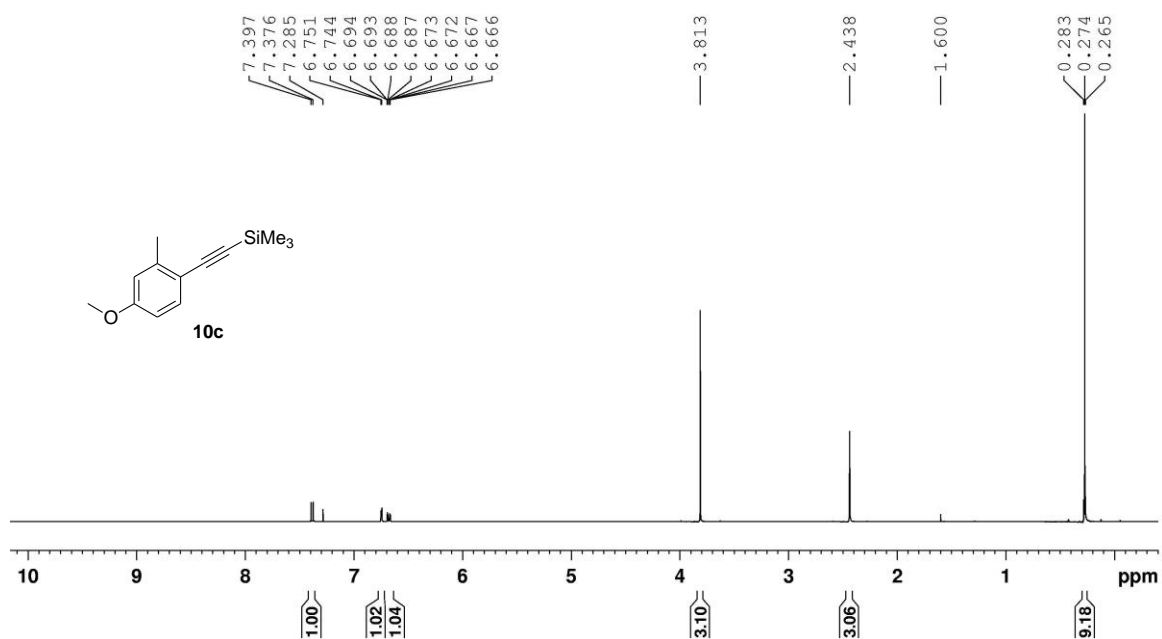

# $^{13}\text{C}$ NMR Spectrum of **10c**

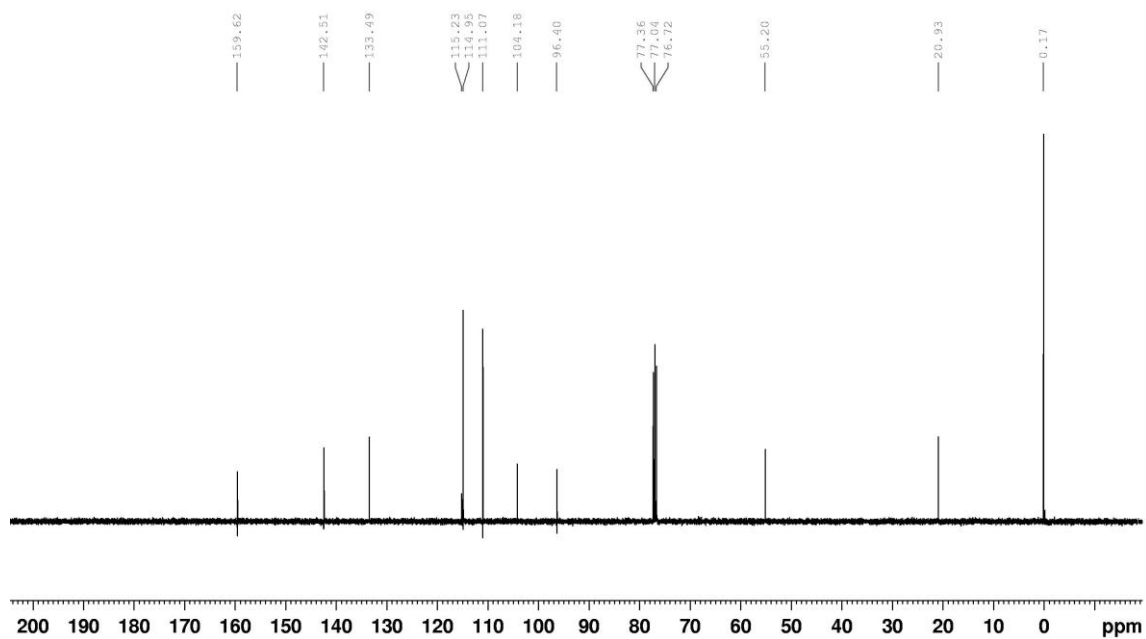

# $^1\text{H}$ NMR Spectrum of **10d**

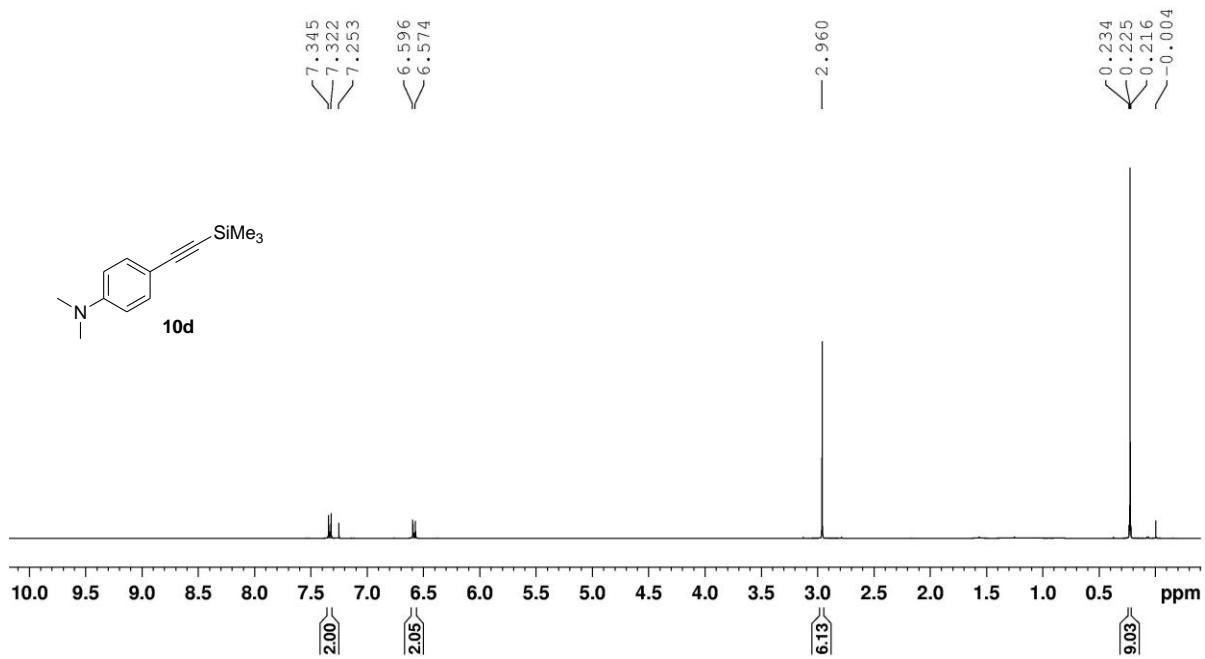

# $^{13}\text{C}$ NMR Spectrum of **10d**

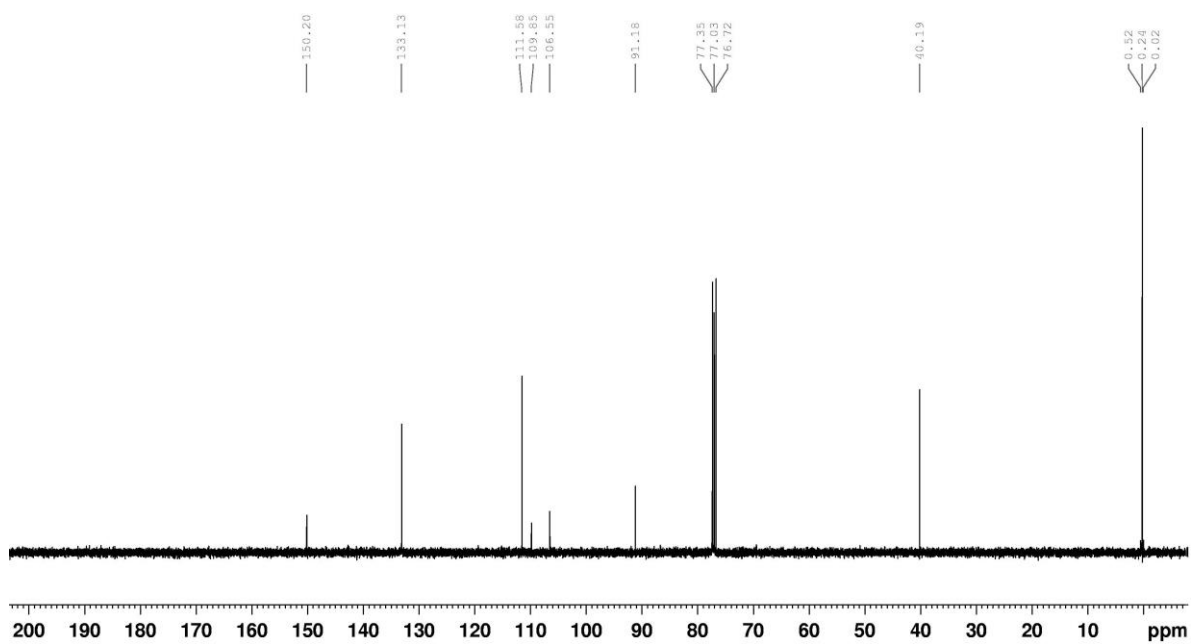

# <sup>1</sup>H NMR Spectrum of 10e

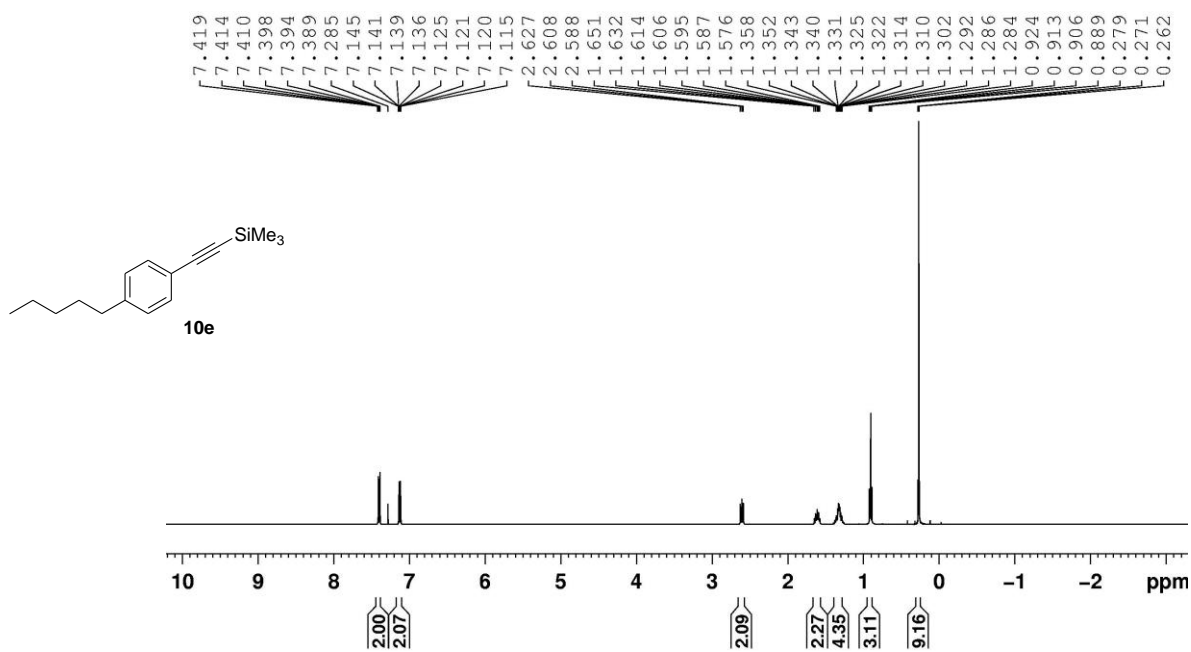

# <sup>13</sup>C NMR Spectrum of 10e

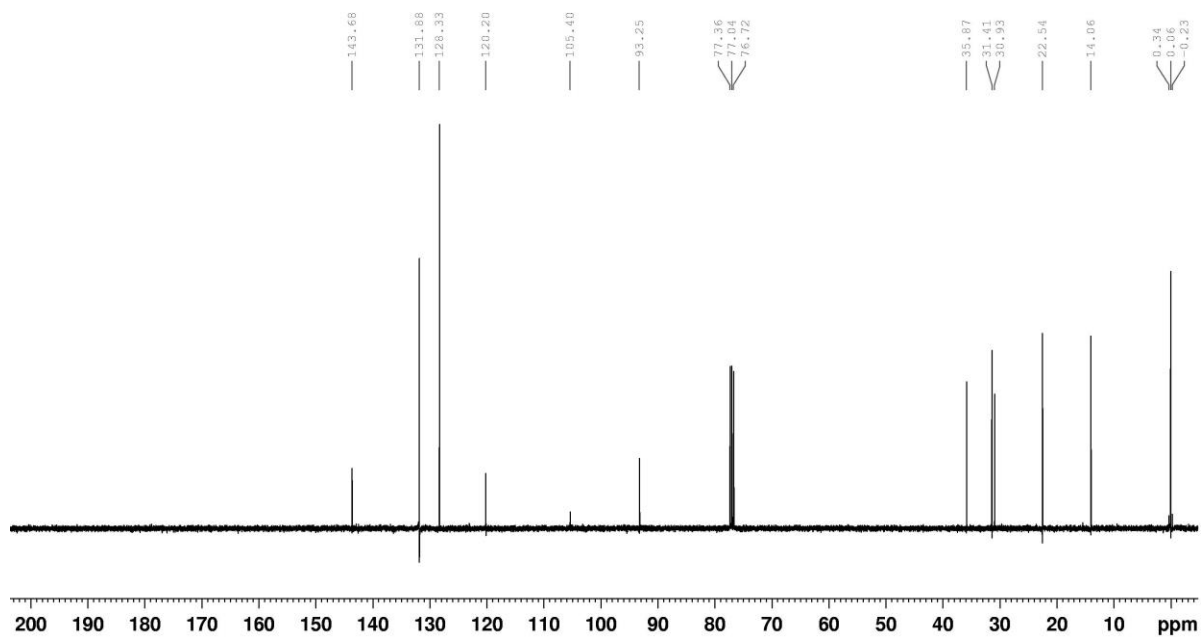

# <sup>1</sup>H NMR Spectrum of **10f**

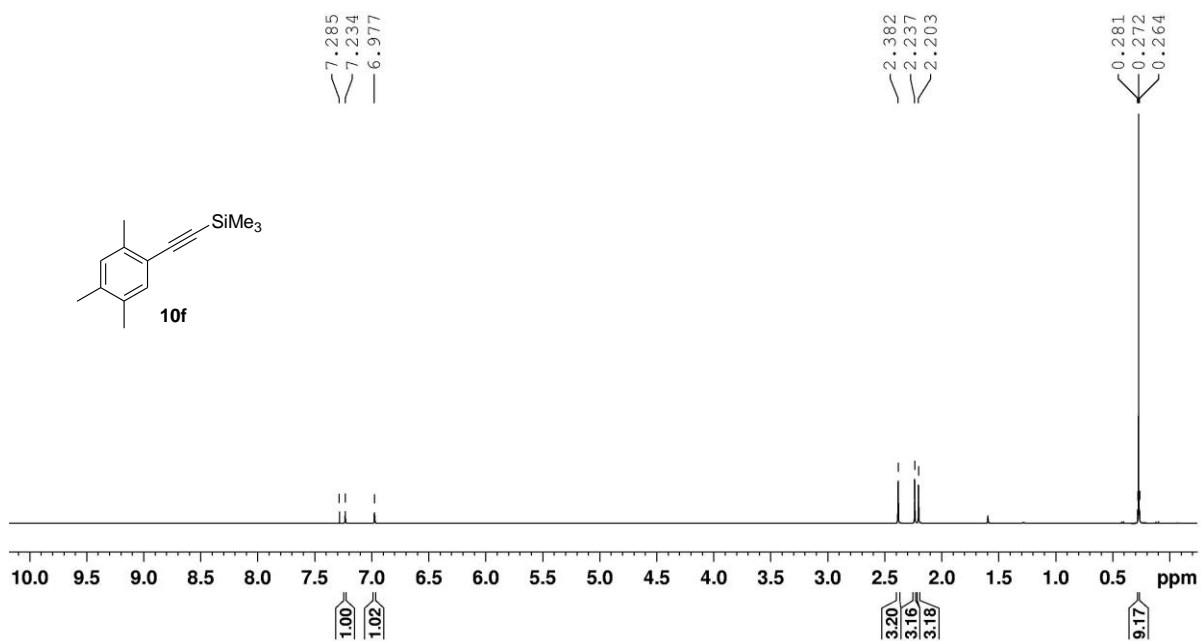

# <sup>13</sup>C NMR Spectrum of **10f**

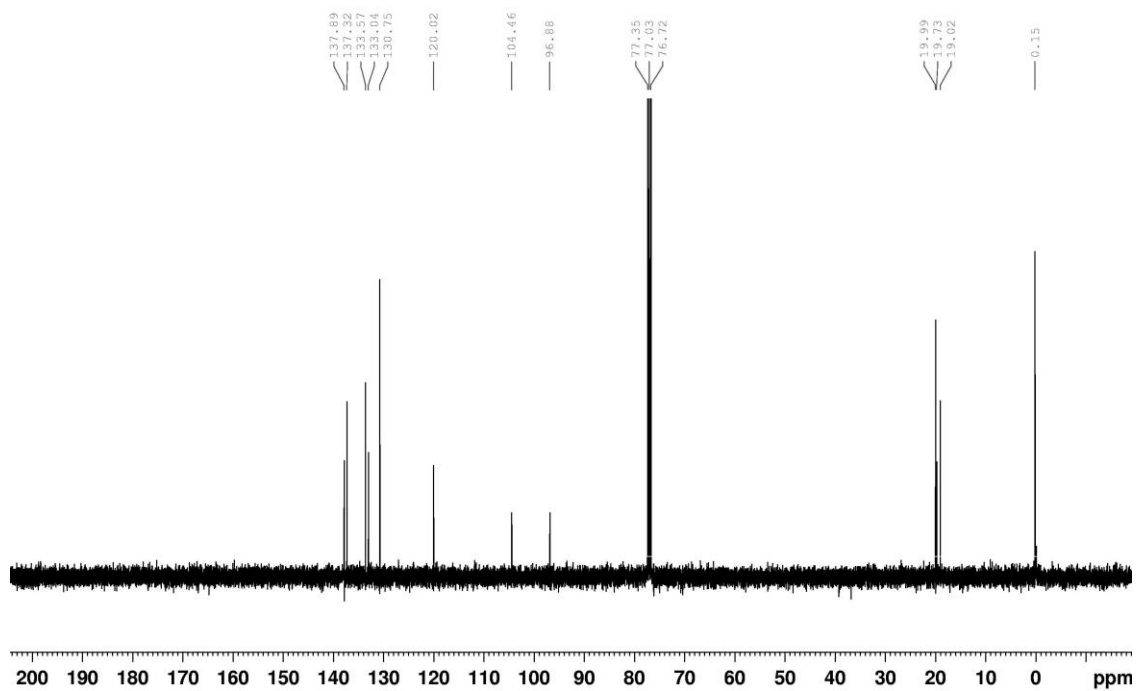

# $^1\text{H}$ NMR Spectrum of **10g**

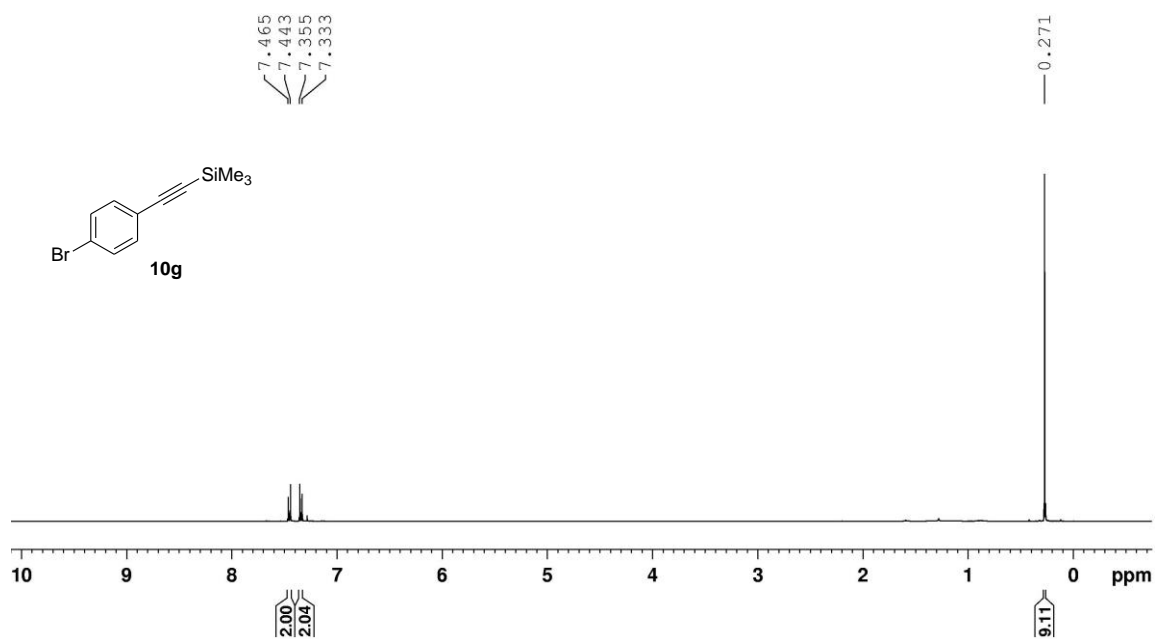

# $^{13}\text{C}$ NMR Spectrum of **10g**

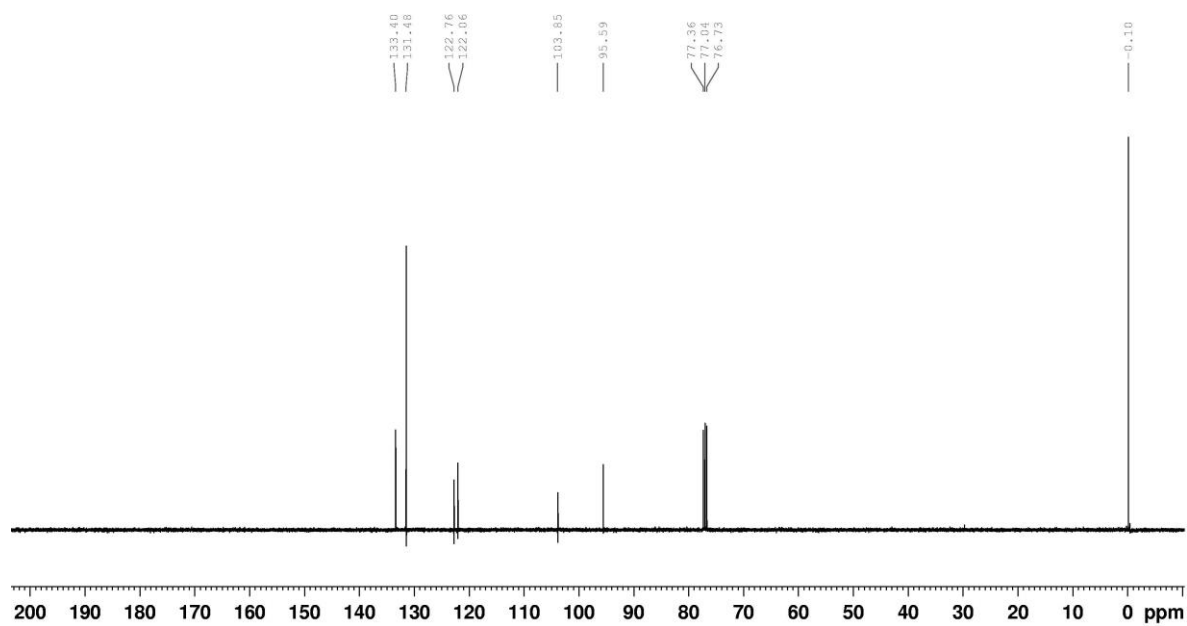

# $^1\text{H}$ NMR Spectrum of **10h**

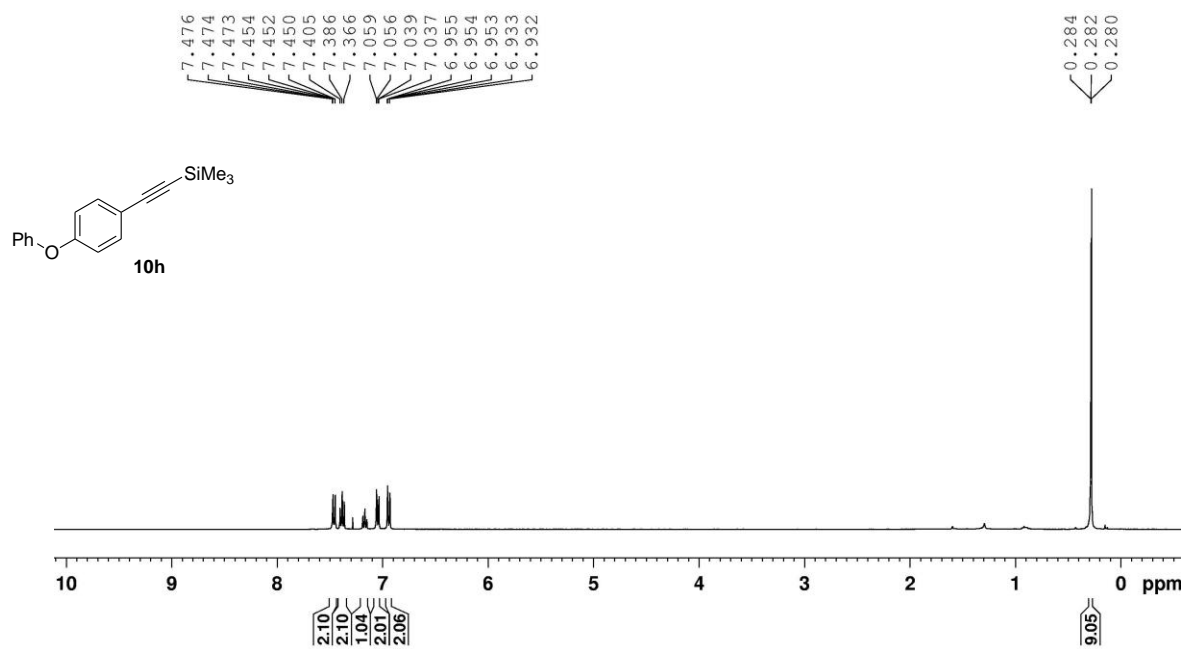

# $^{13}\text{C}$ NMR Spectrum of **10h**

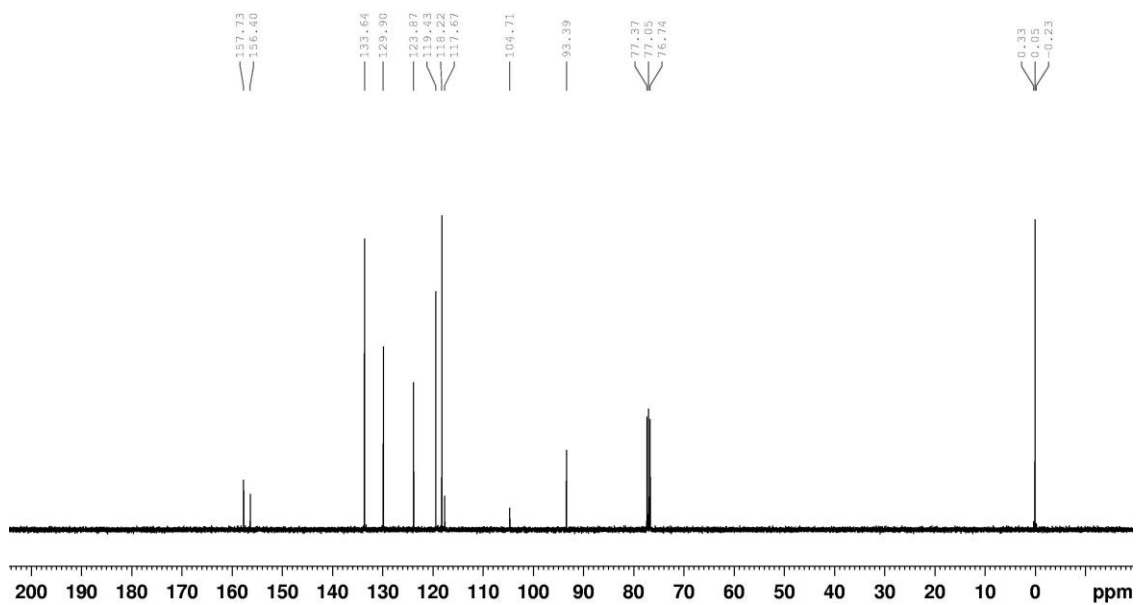

# <sup>1</sup>H NMR Spectrum of **10i**

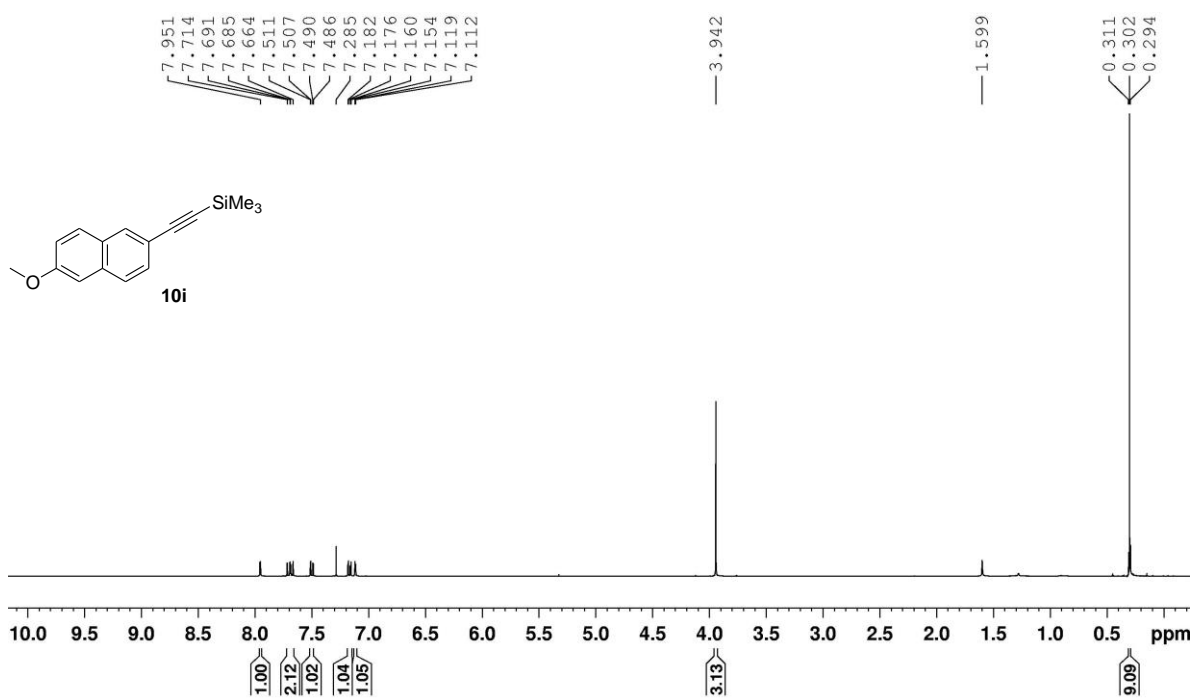

# <sup>13</sup>C NMR Spectrum of **10i**

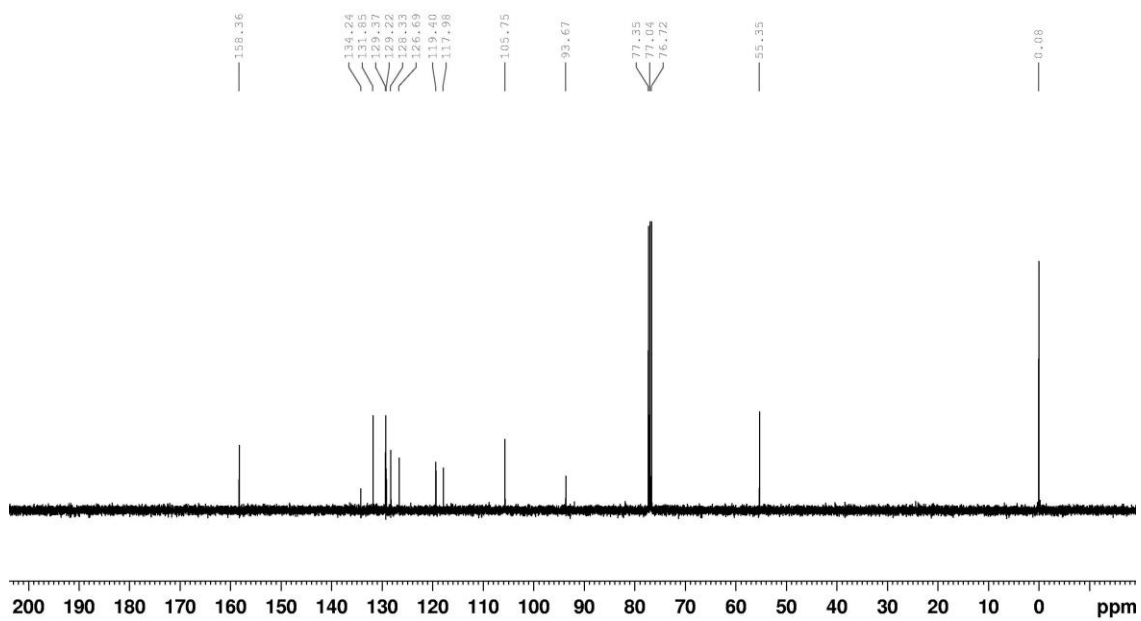



# <sup>1</sup>H NMR Spectrum of 10j

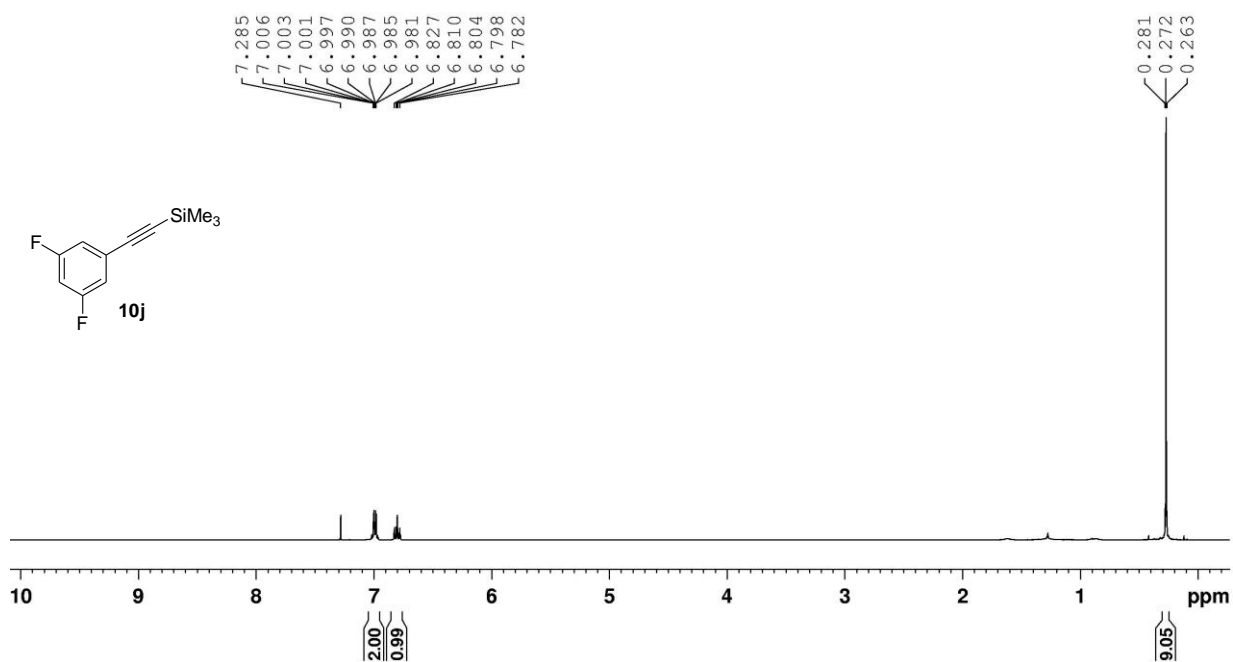

# <sup>13</sup>C NMR Spectrum of 10j

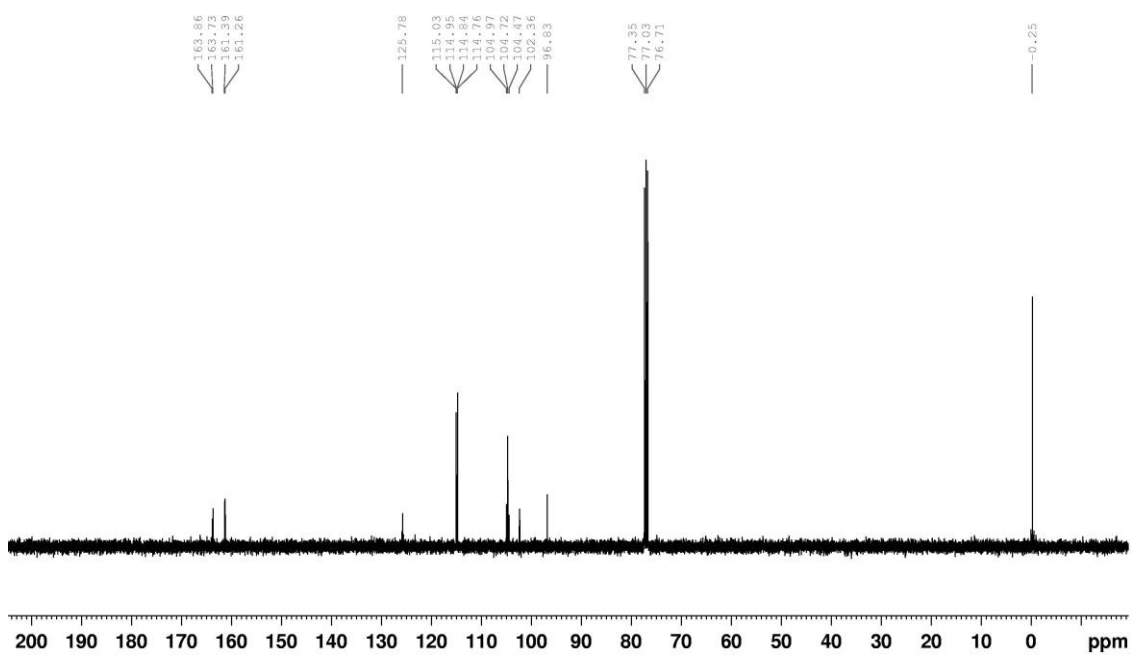

# <sup>1</sup>H NMR Spectrum of **10k**

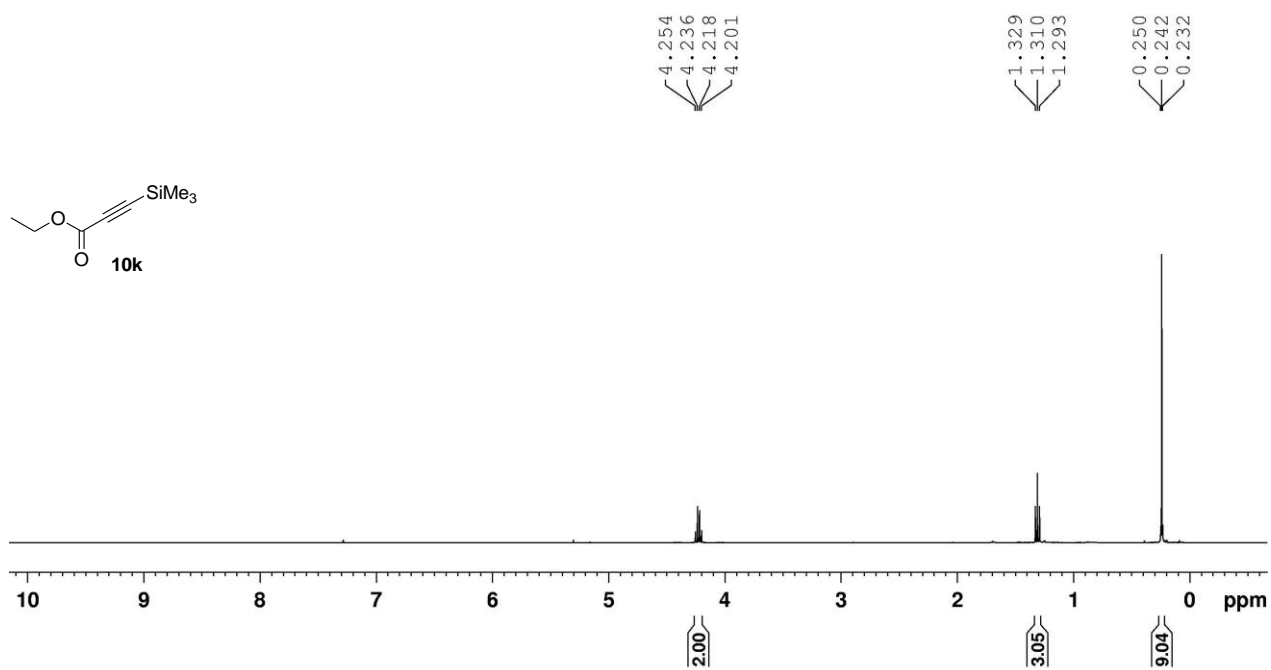

# <sup>13</sup>C NMR Spectrum of **10k**

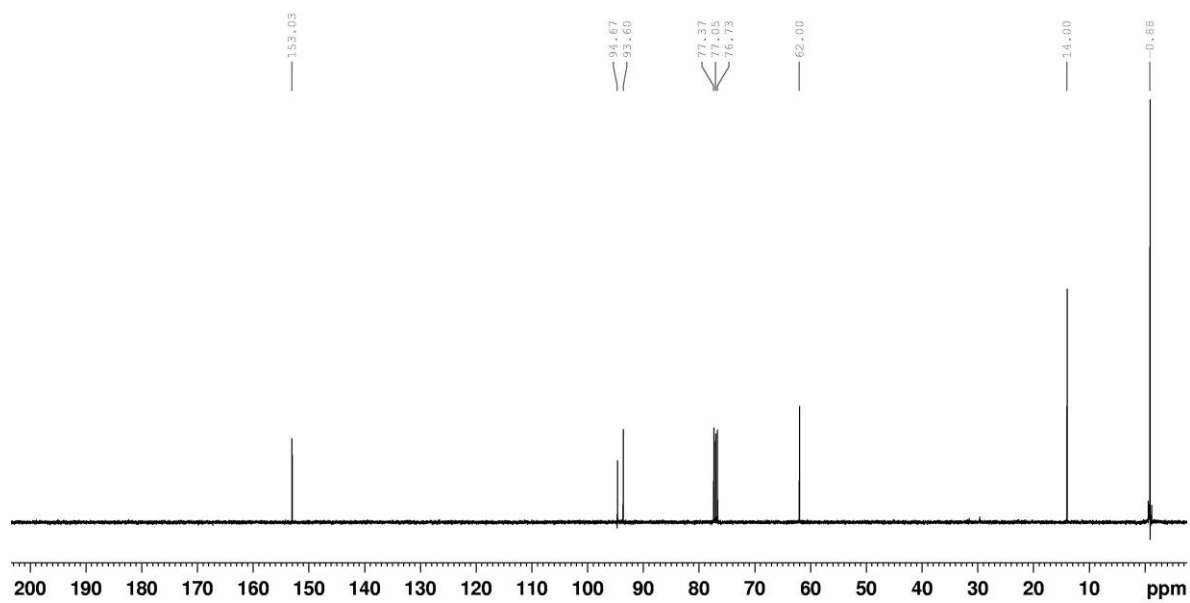

# <sup>1</sup>H NMR Spectrum of **101**

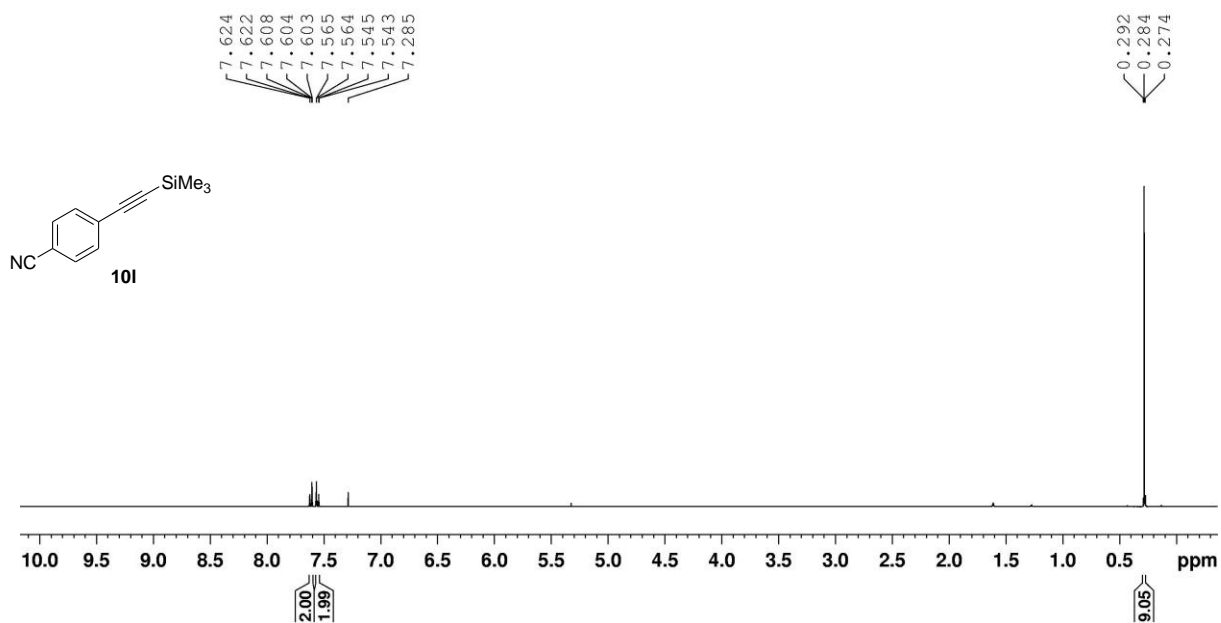

# <sup>13</sup>C NMR Spectrum of **101**

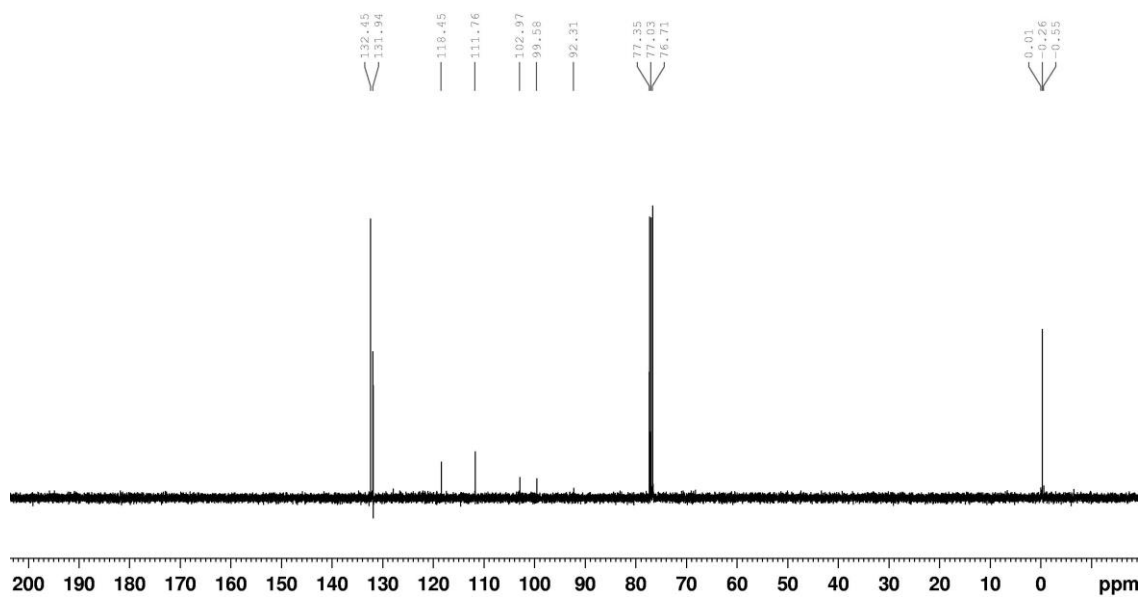

### $^1\text{H}$ NMR Spectrum of **10m**

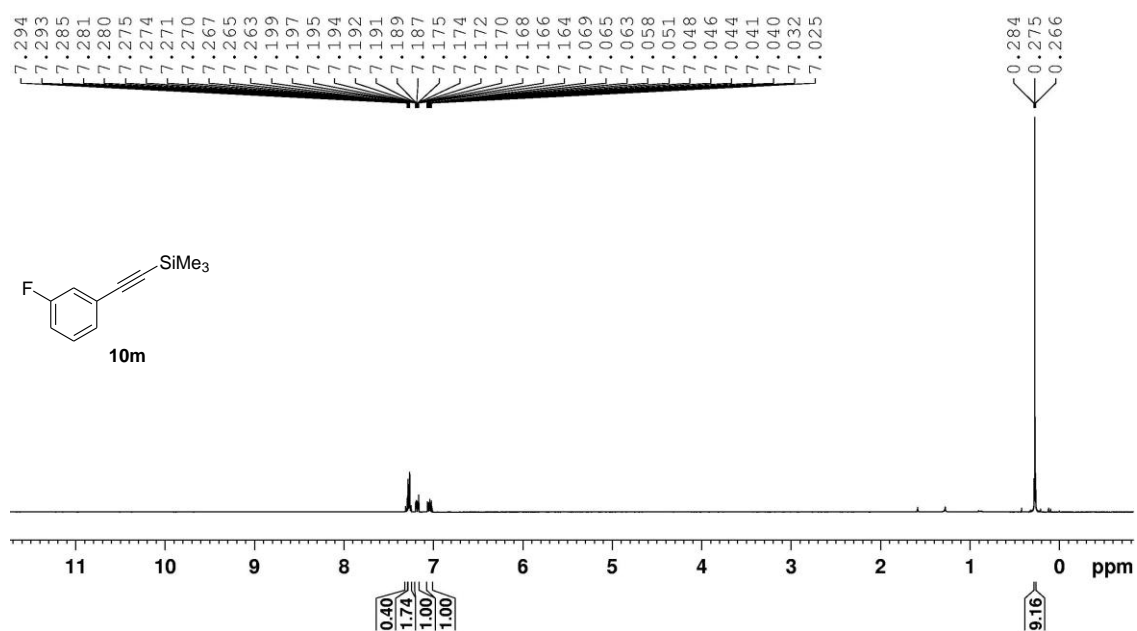

### $^{13}\text{C}$ NMR Spectrum of **10m**

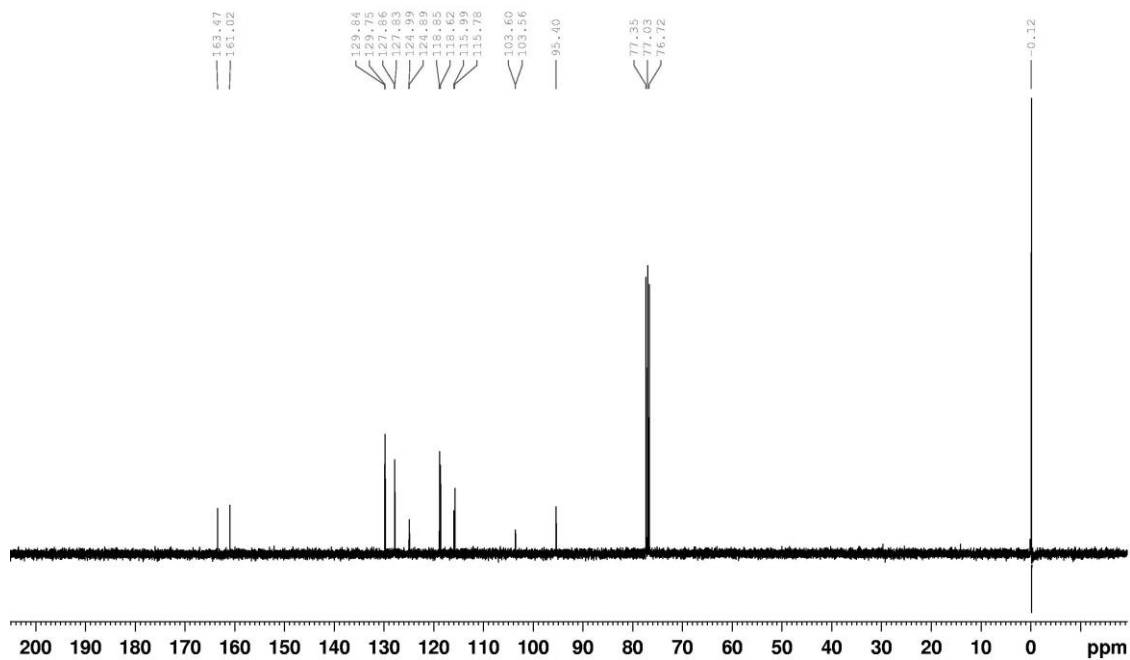

# <sup>1</sup>H NMR Spectrum of 10n

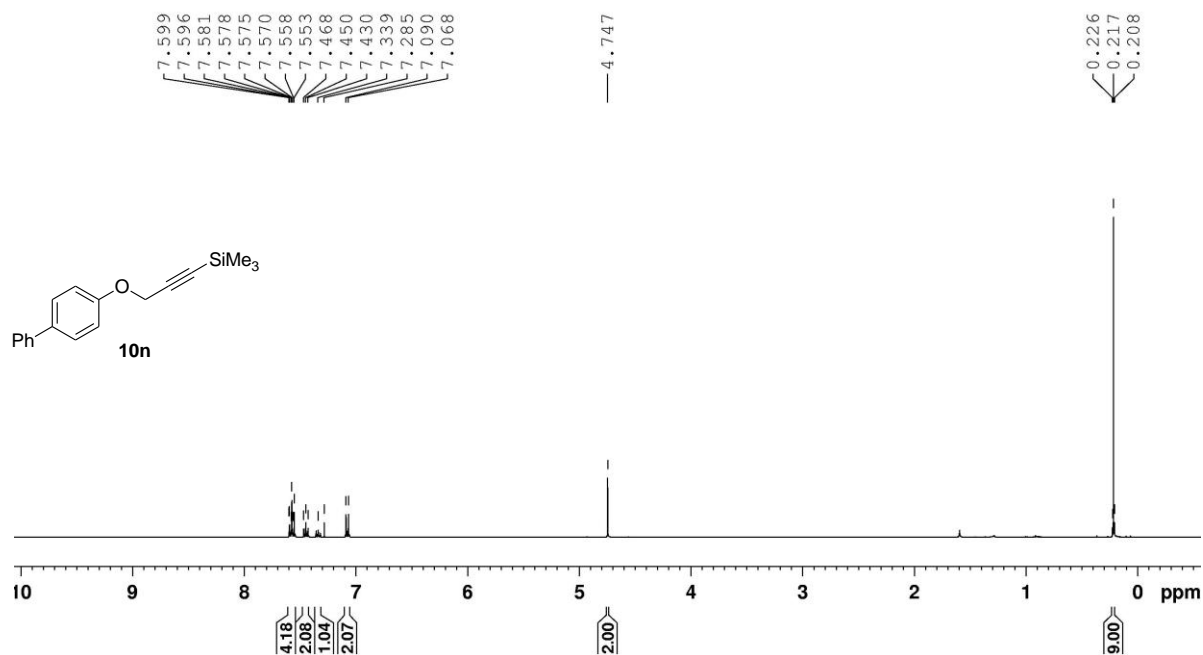

# <sup>13</sup>C NMR Spectrum of 10n

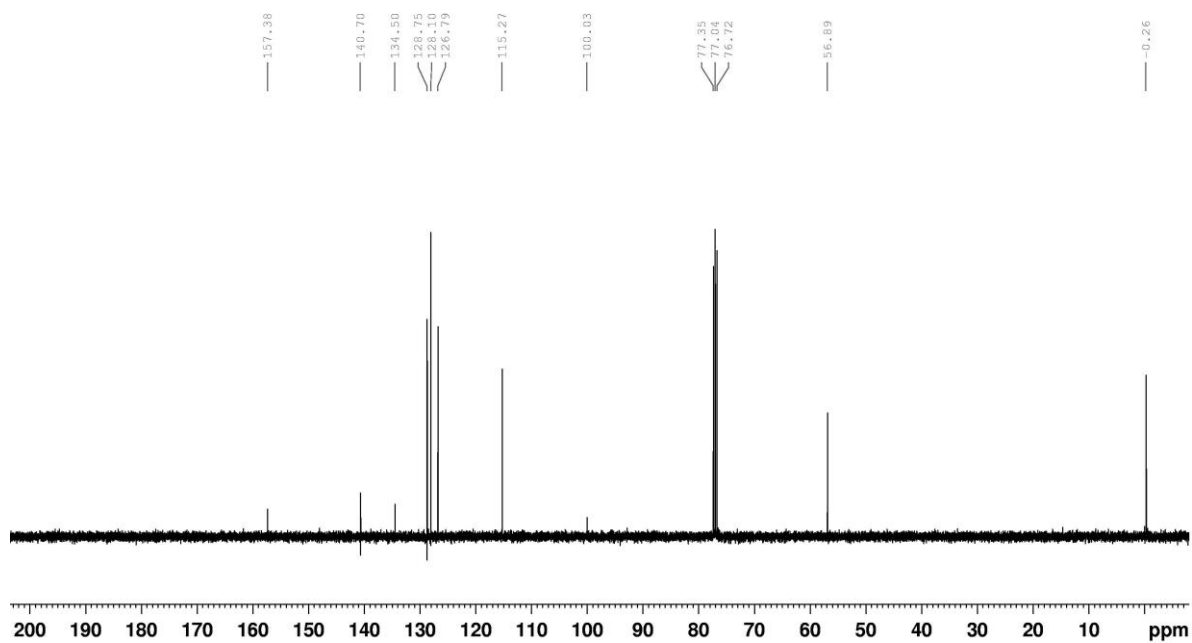

# <sup>1</sup>H NMR Spectrum of **10o**

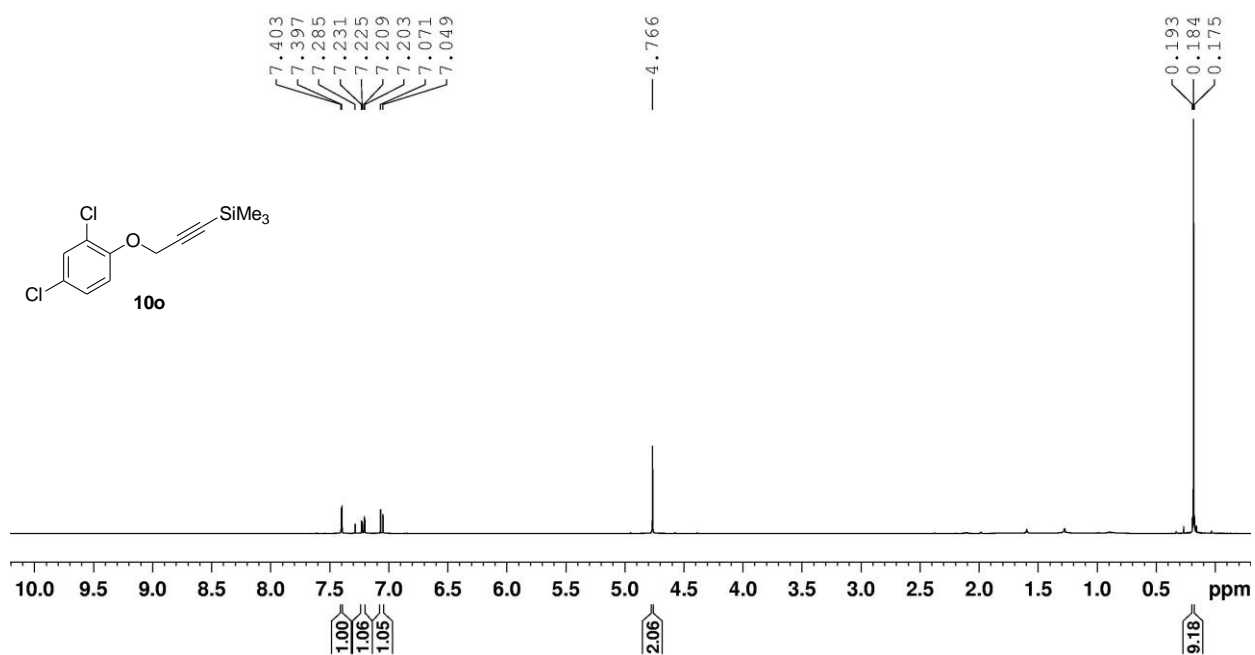

# <sup>13</sup>C NMR Spectrum of **10o**

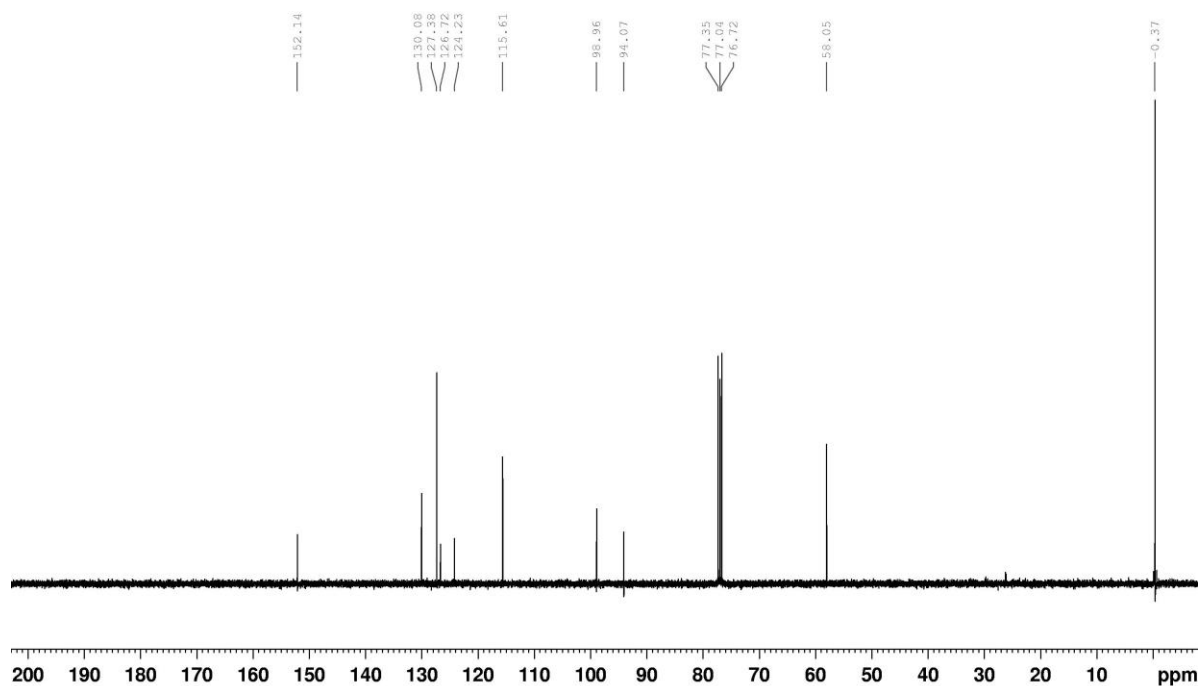

# $^1\text{H}$ NMR Spectrum of **10p**

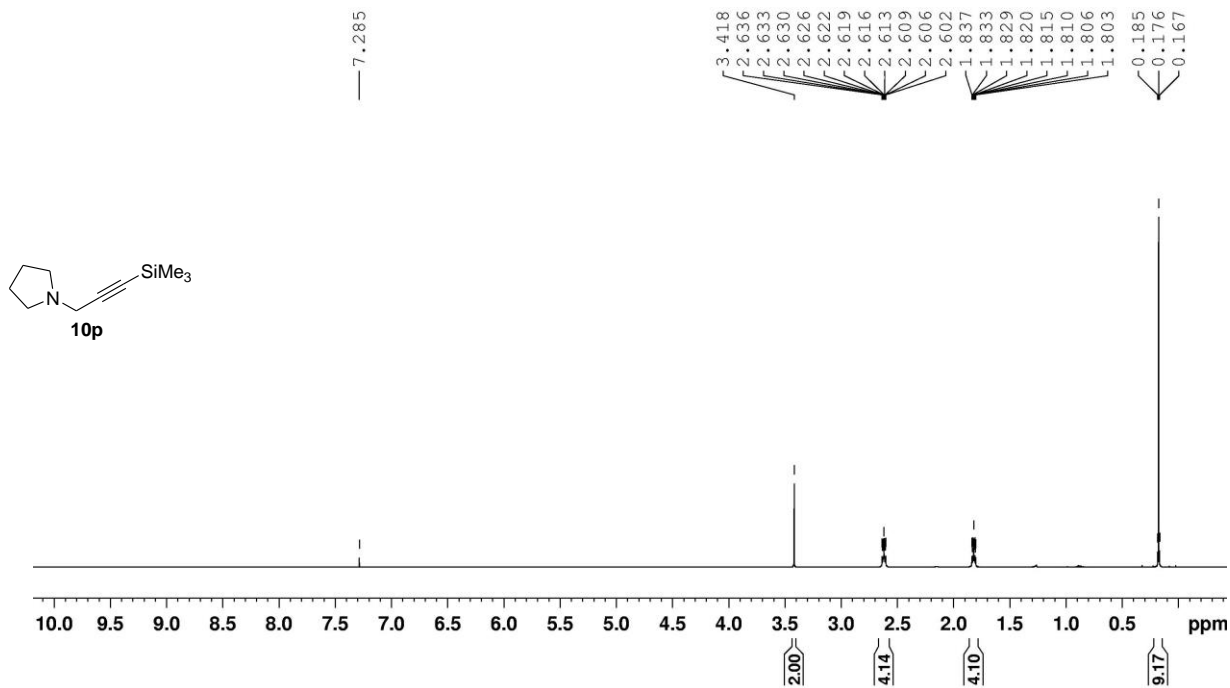

# $^{13}\text{C}$ NMR Spectrum of **10p**

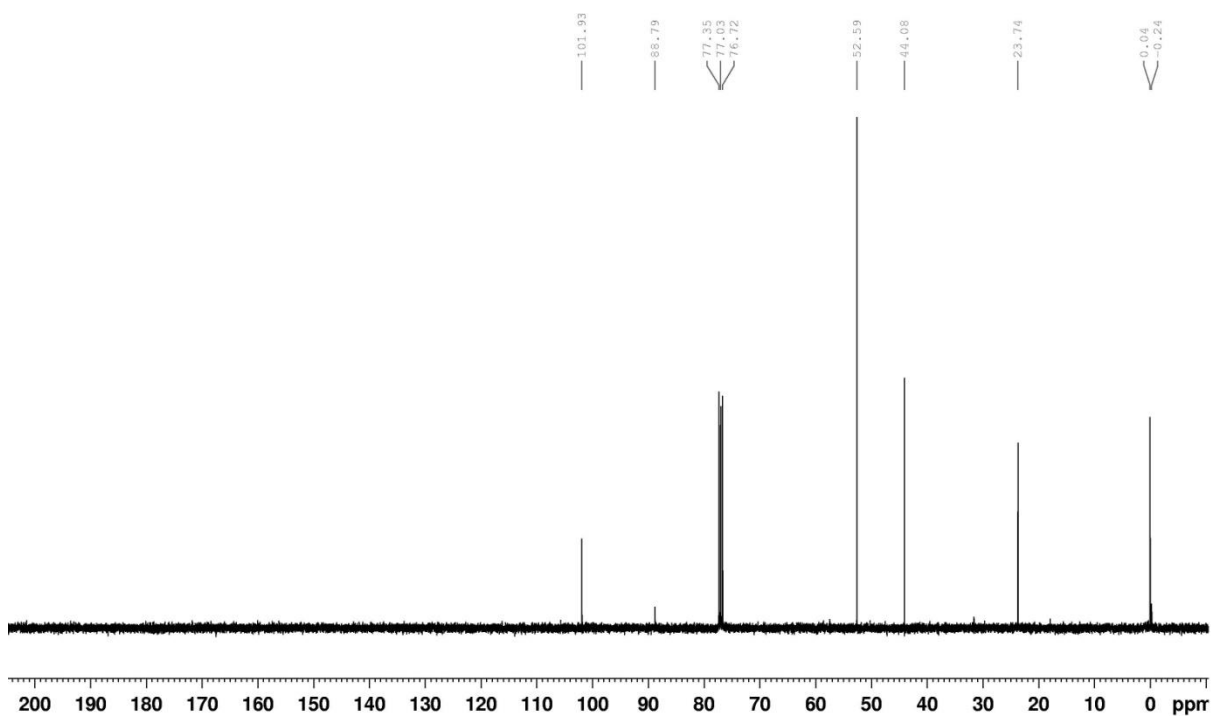

# <sup>1</sup>H NMR Spectrum of 10q

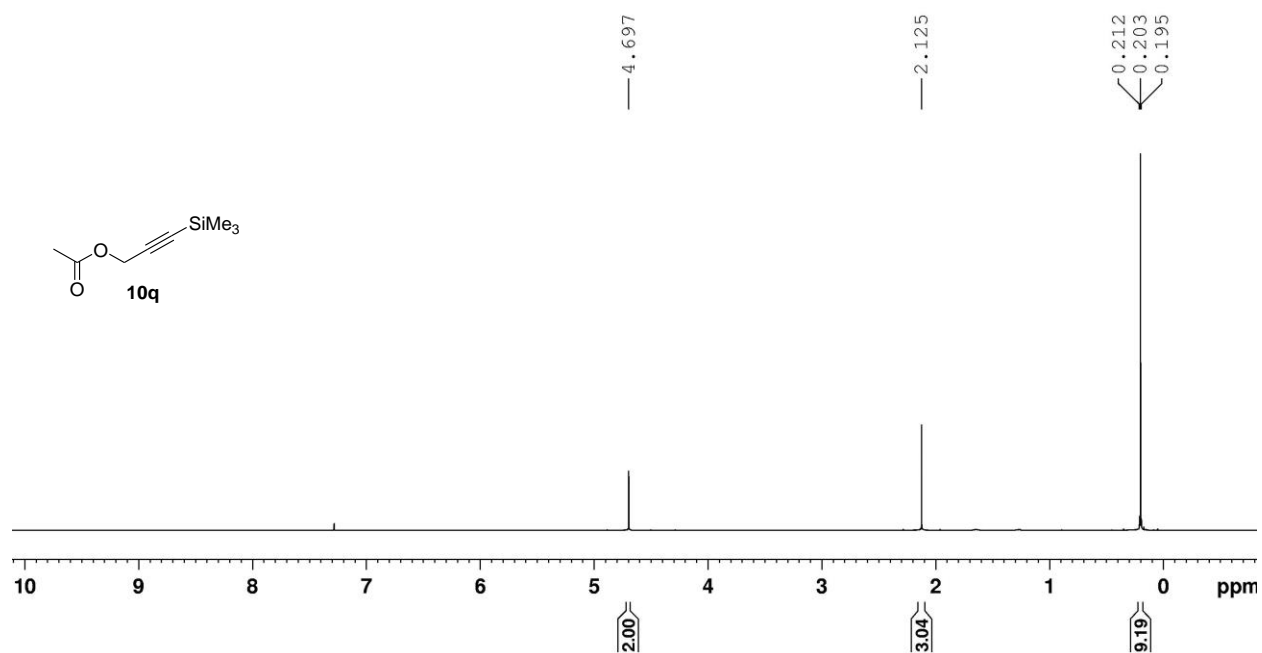

# <sup>13</sup>C NMR Spectrum of 10q

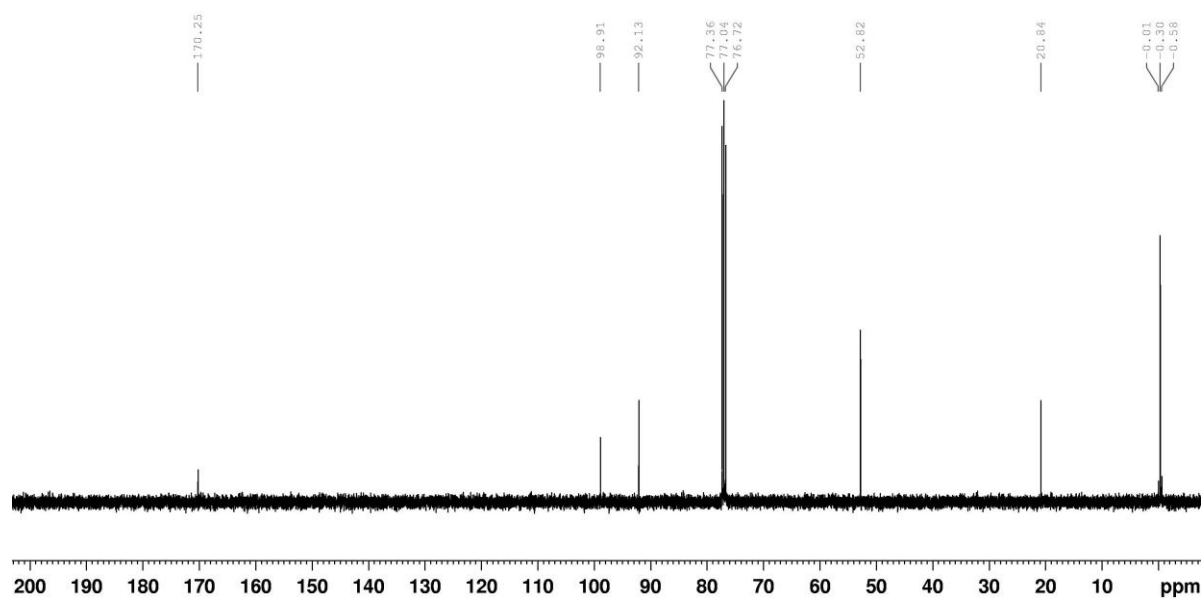



# $^1\text{H}$ NMR Spectrum of **10r**

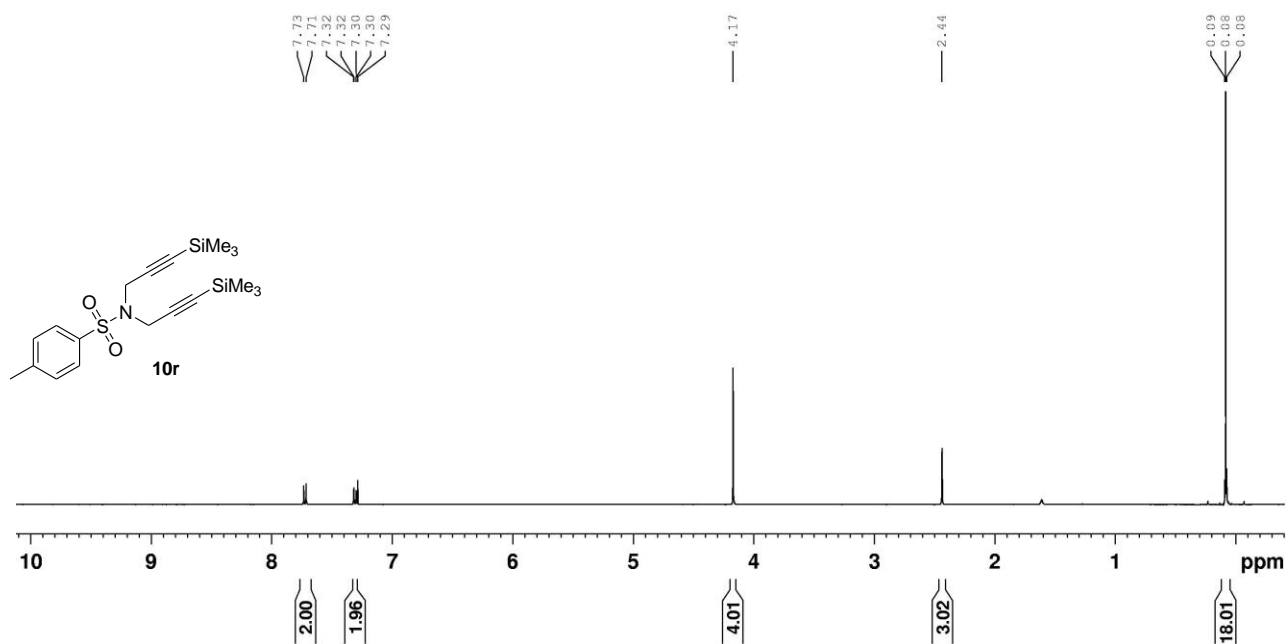

# $^{13}\text{C}$ NMR Spectrum of **10r**

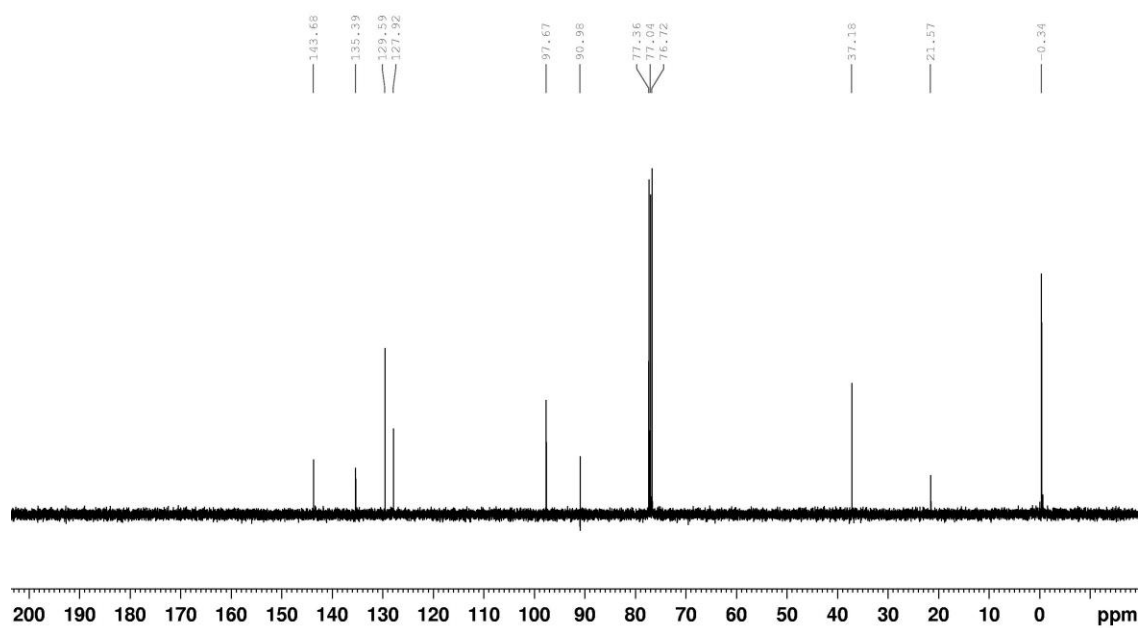

# <sup>1</sup>H NMR Spectrum of 10s

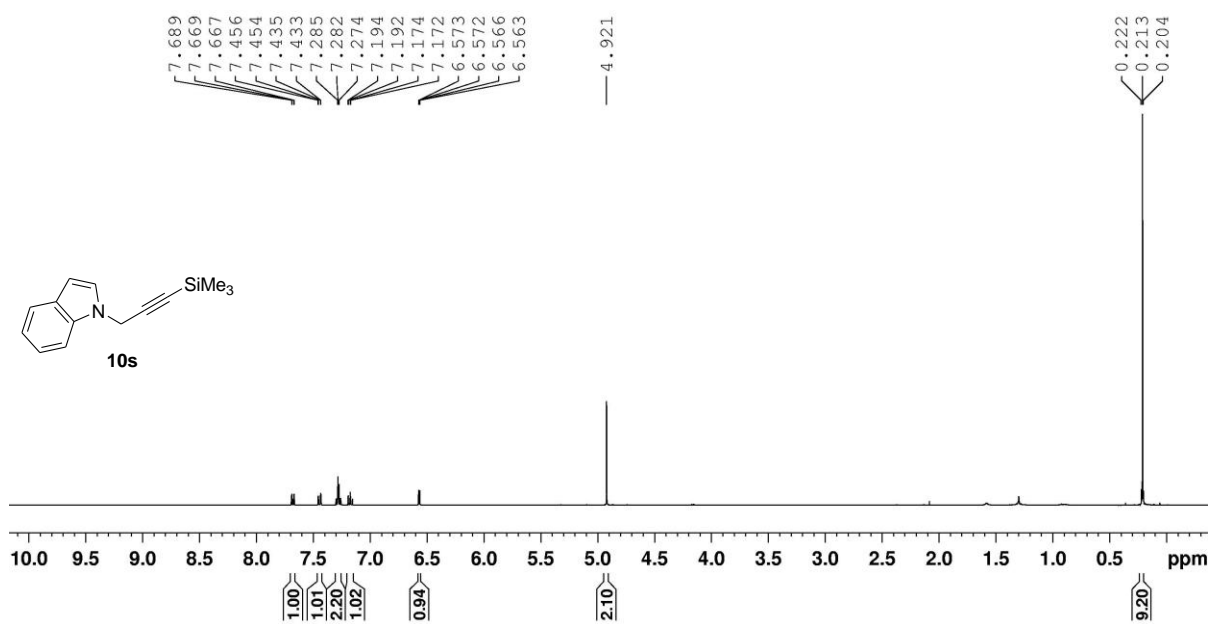

# <sup>13</sup>C NMR Spectrum of 10s

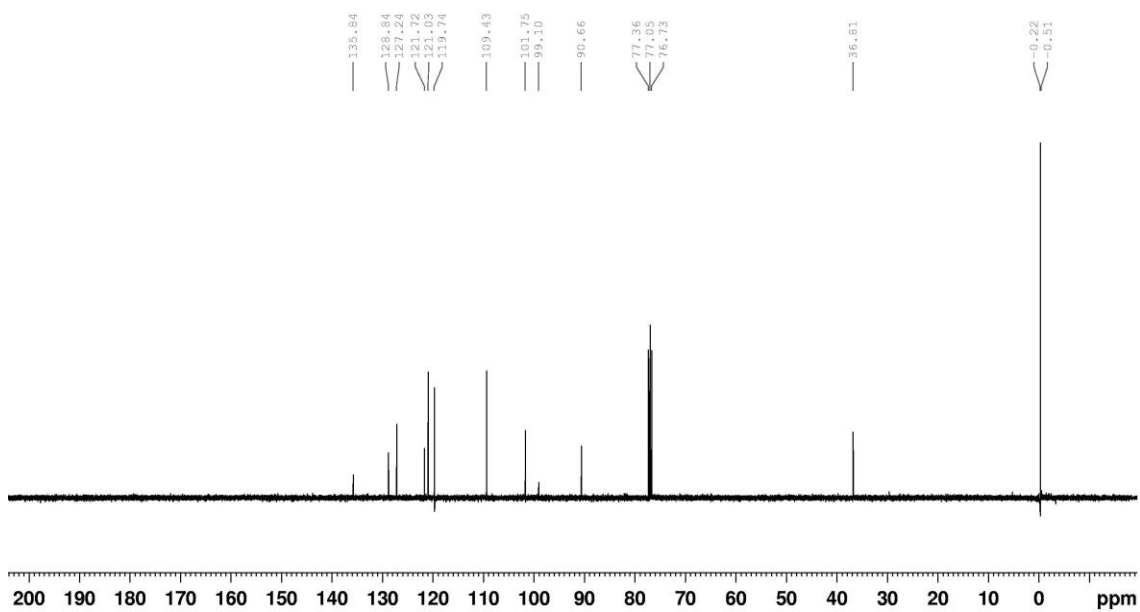

# <sup>1</sup>H NMR Spectrum of **10t**

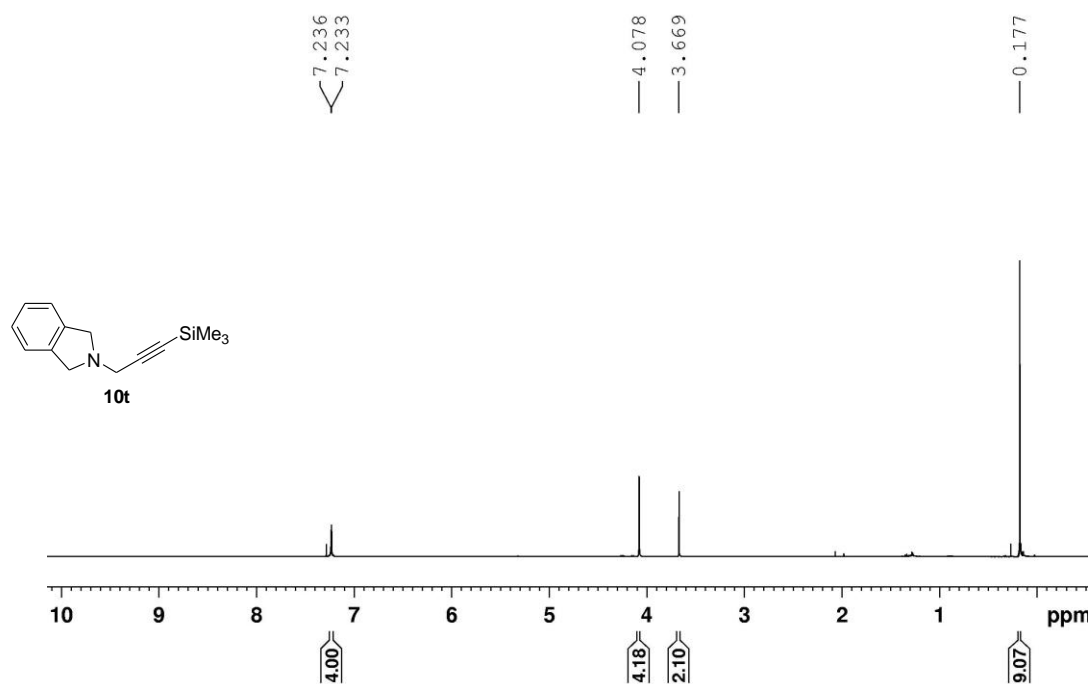

# <sup>13</sup>C NMR Spectrum of **10t**

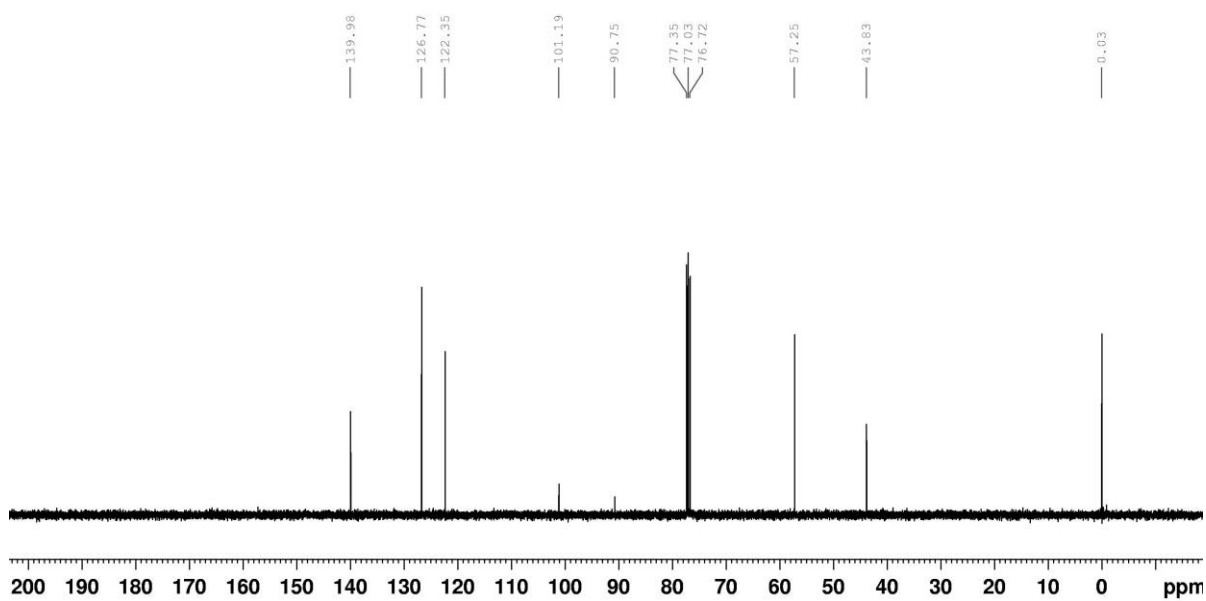

### $^1\text{H}$ NMR Spectrum of **10u**

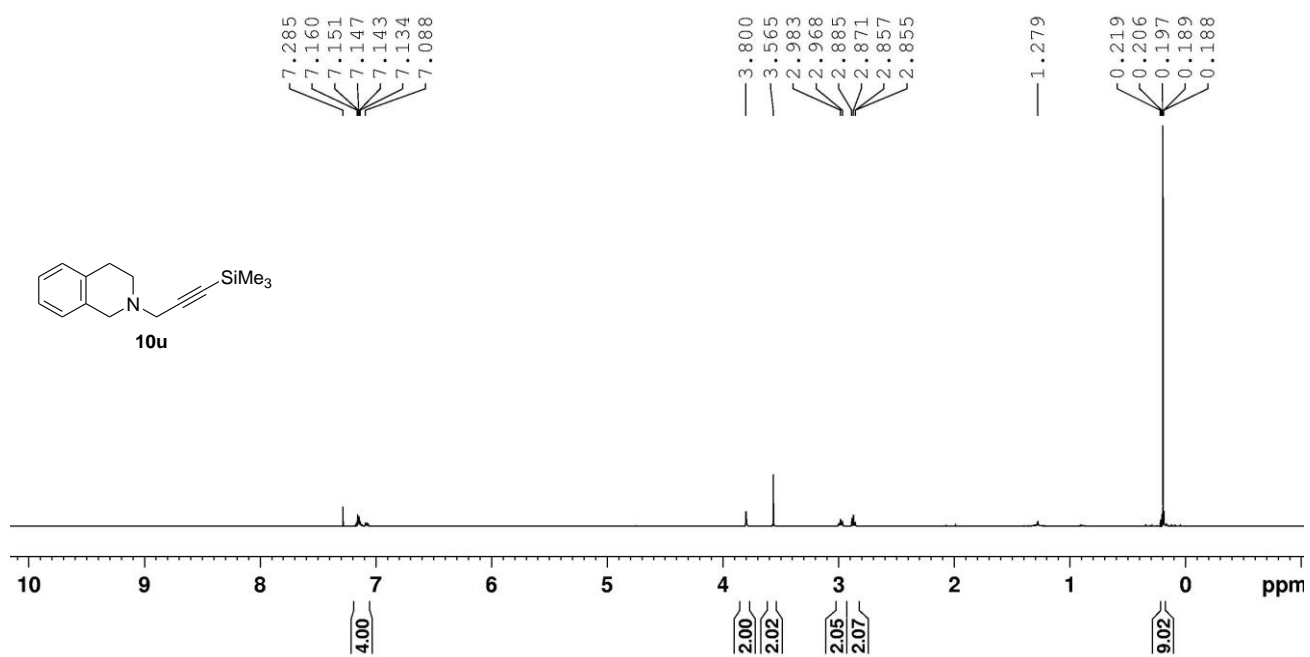

### $^{13}\text{C}$ NMR Spectrum of **10u**

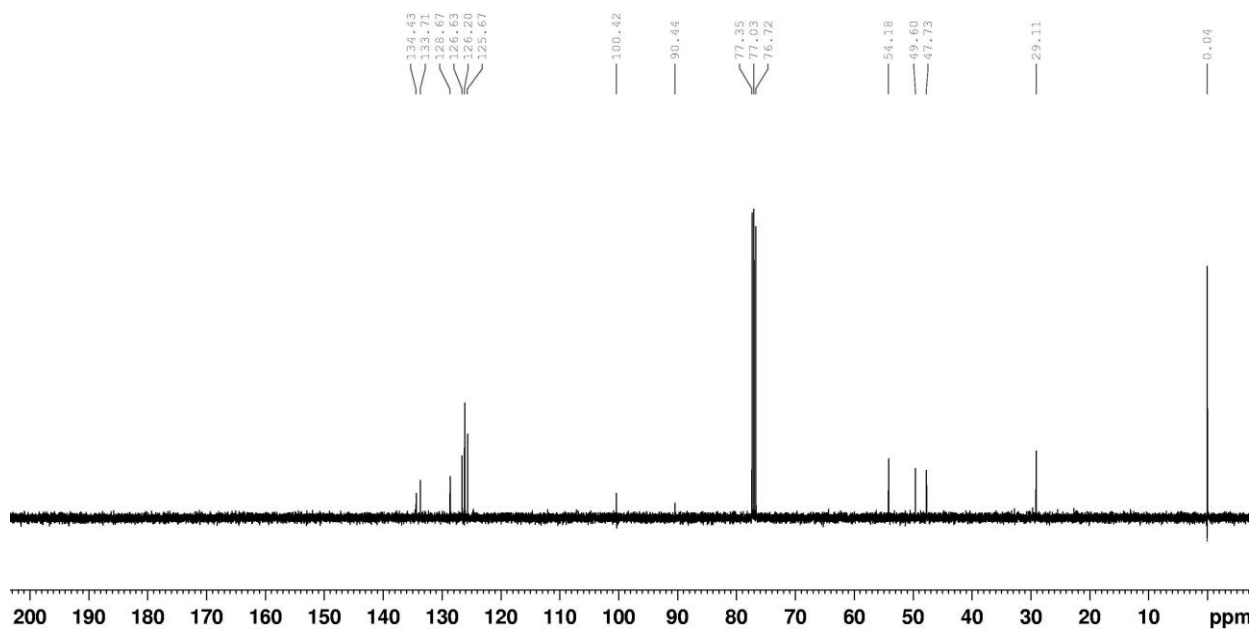

# <sup>1</sup>H NMR Spectrum of 10v

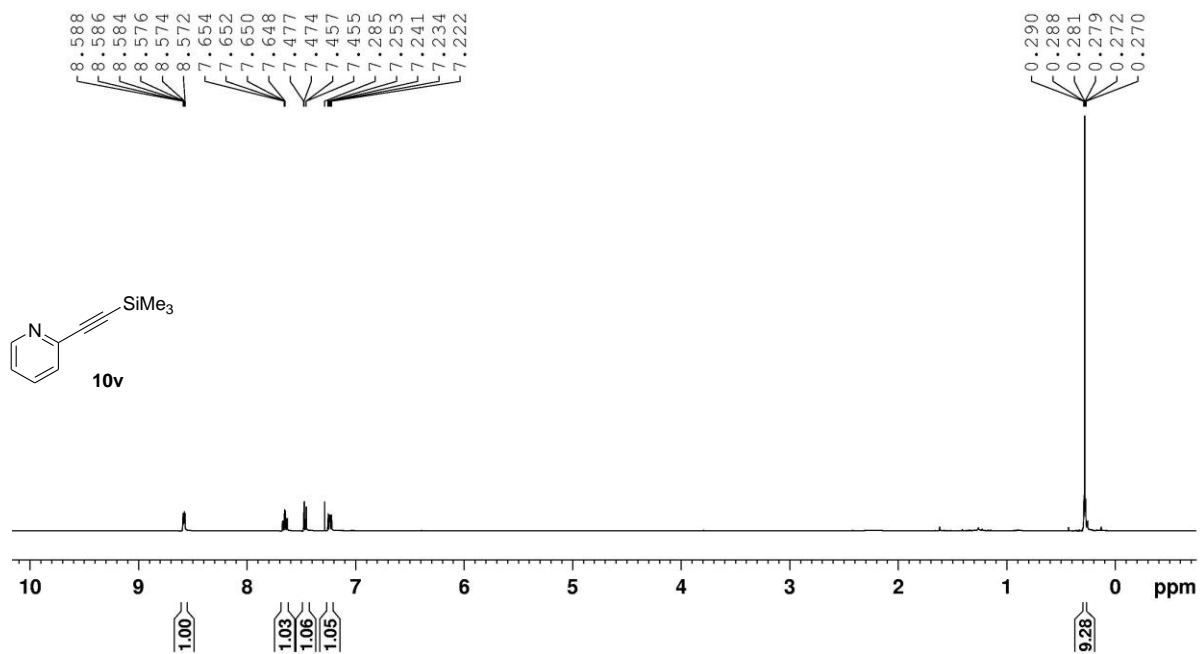

# <sup>13</sup>C NMR Spectrum of 10v

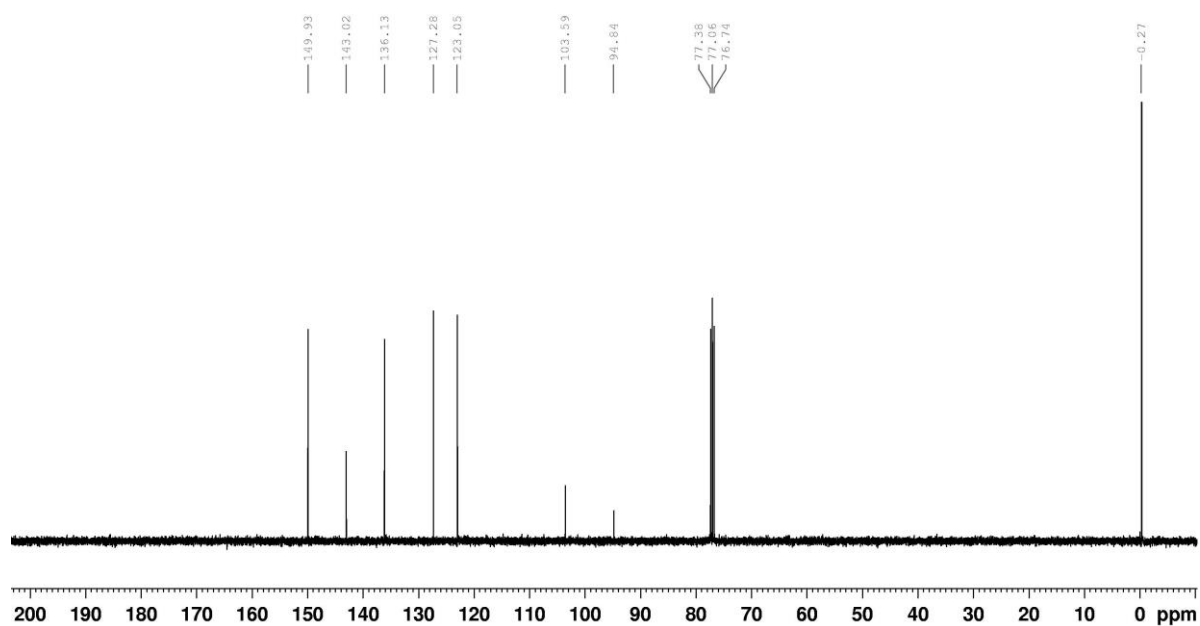

# $^1\text{H}$ NMR Spectrum of **10w**

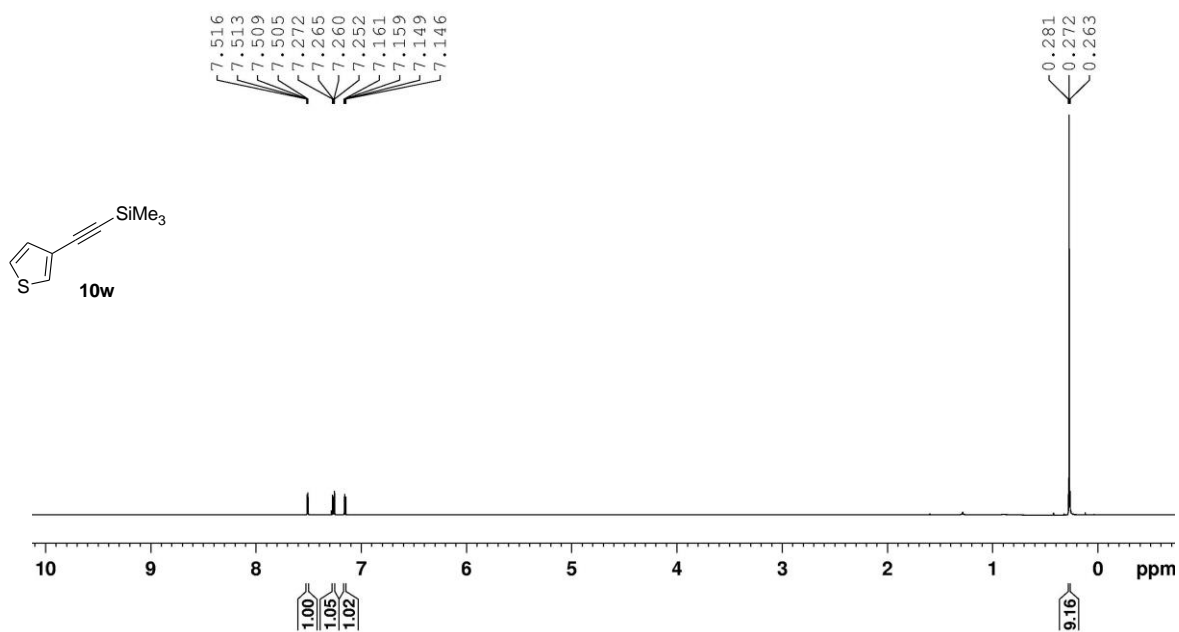

# $^{13}\text{C}$ NMR Spectrum of **10w**

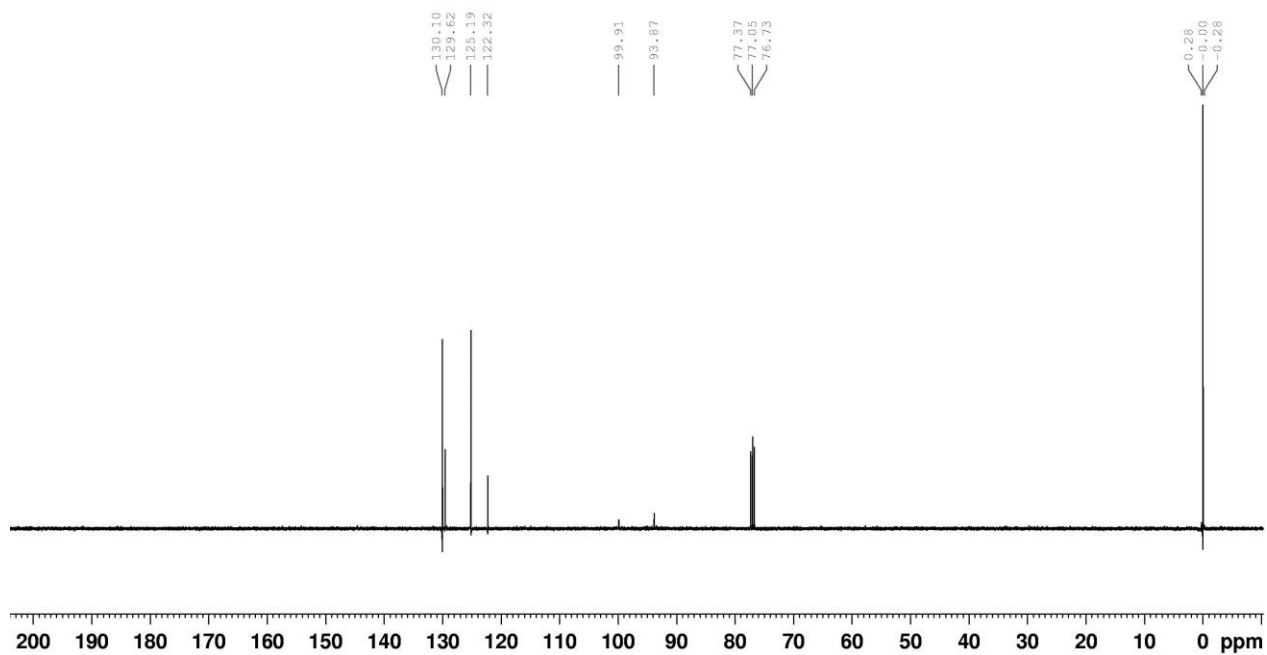

# <sup>1</sup>H NMR Spectrum of 10x

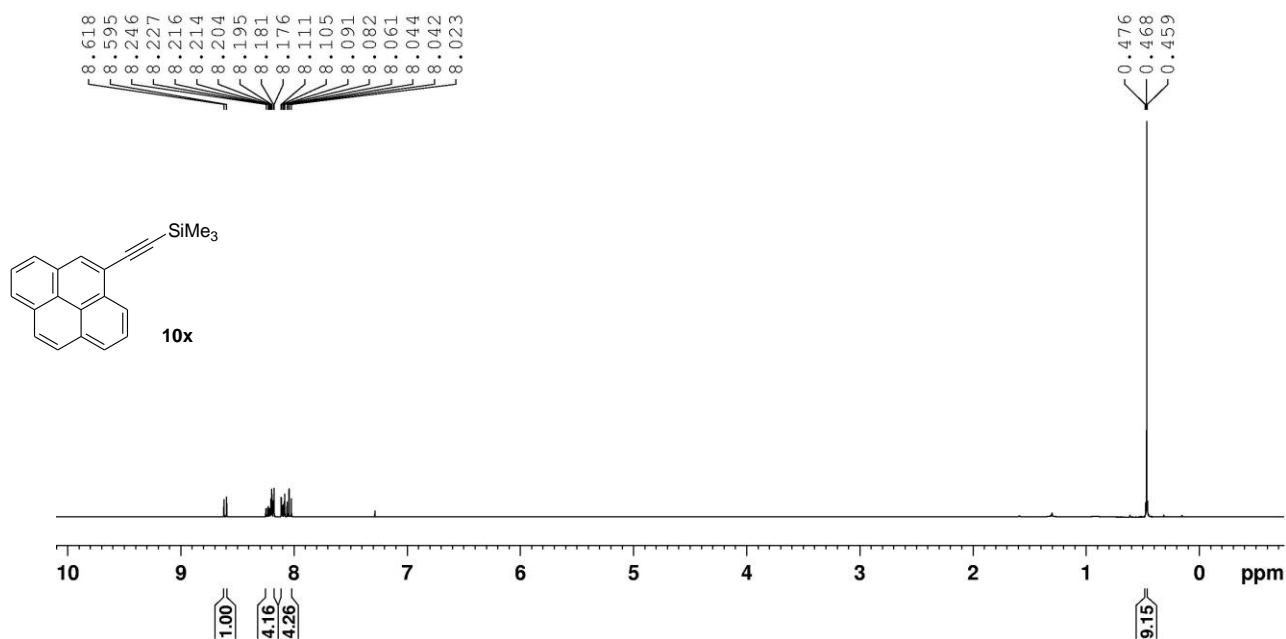

# <sup>13</sup>C NMR Spectrum of 10x

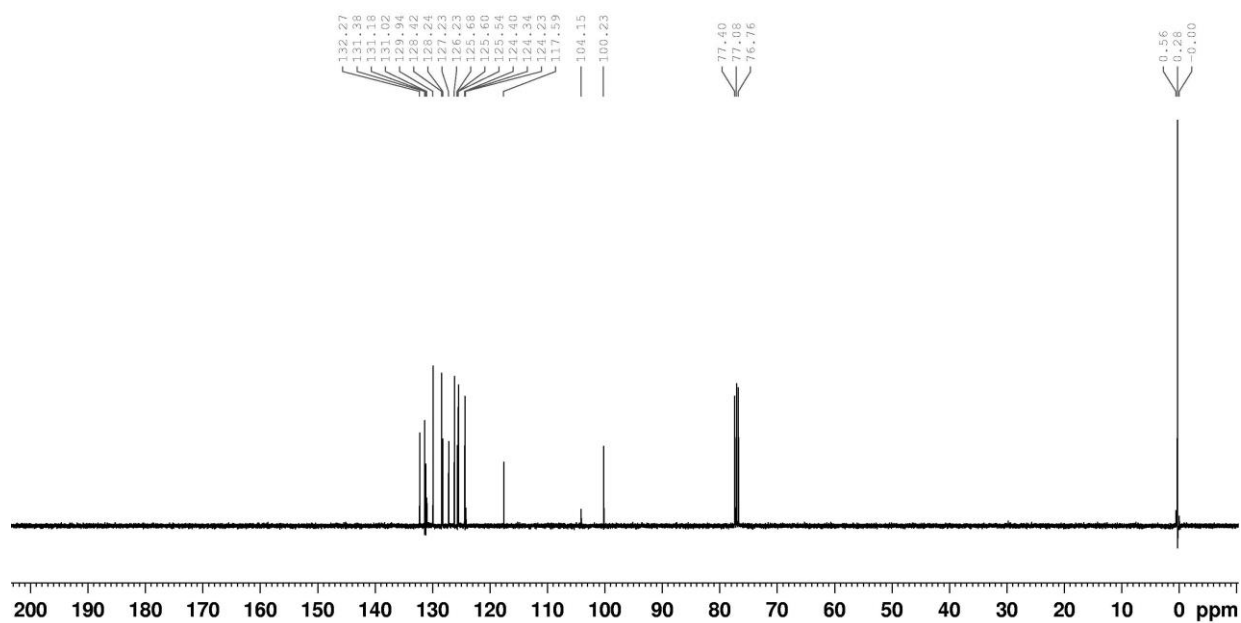

# <sup>1</sup>H NMR Spectrum of **12a**

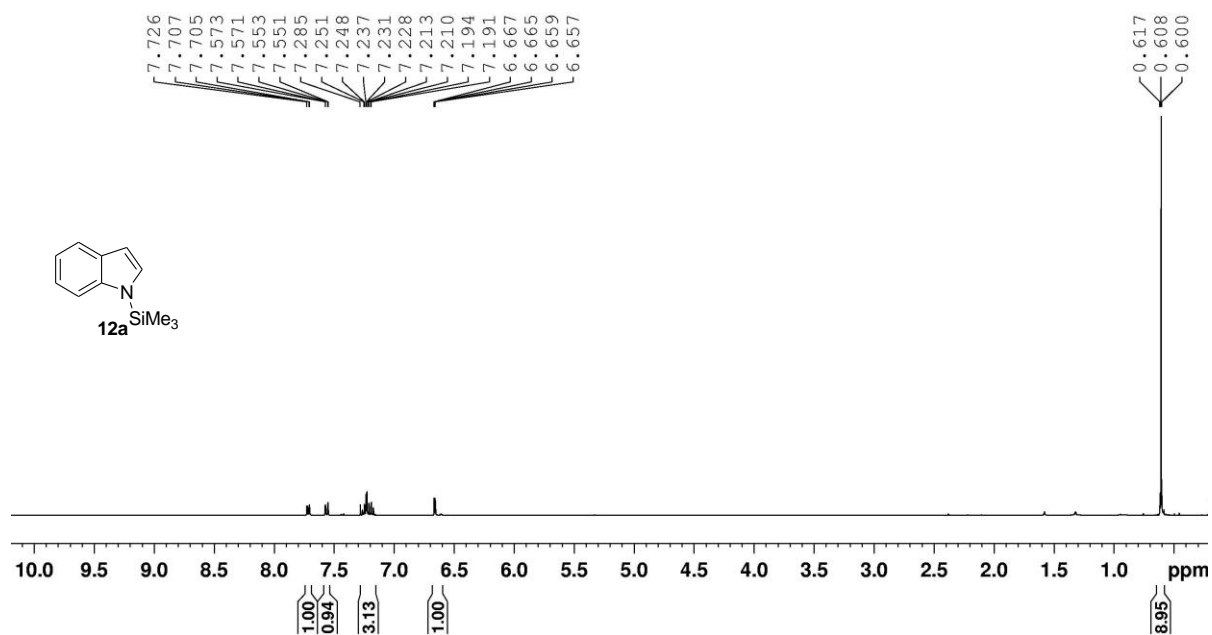

# <sup>13</sup>C NMR Spectrum of **12a**

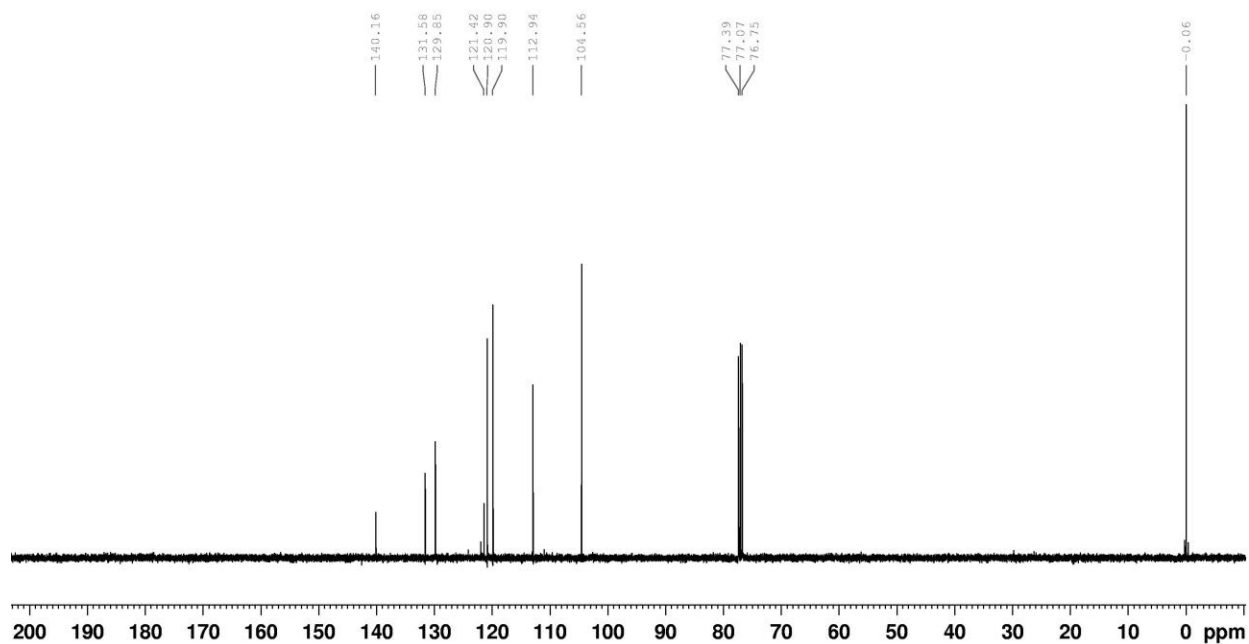



### <sup>1</sup>H NMR Spectrum of **12b**

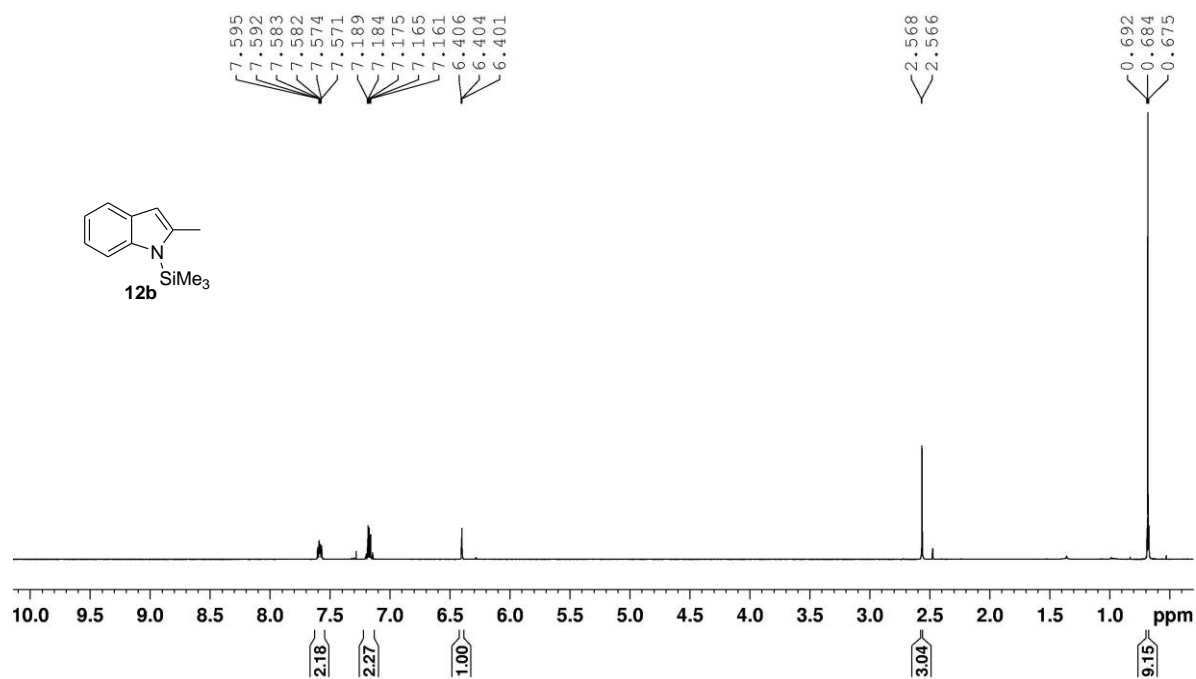

### <sup>13</sup>C NMR Spectrum of **12b**

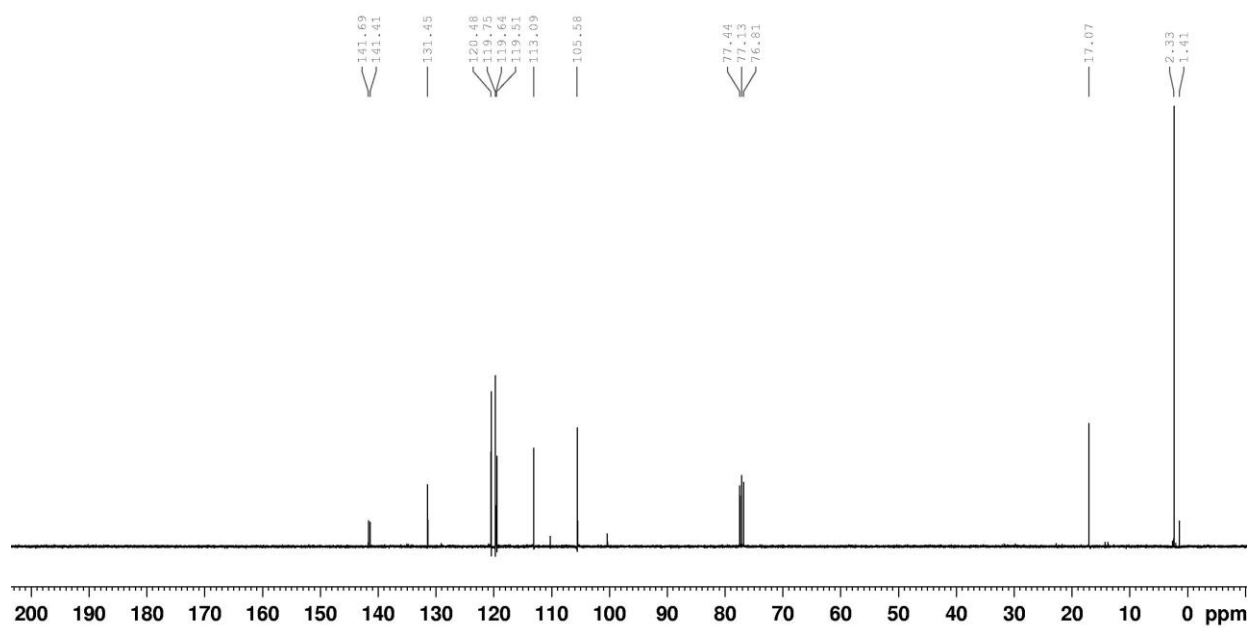

### $^1\text{H}$ NMR Spectrum of **12c**

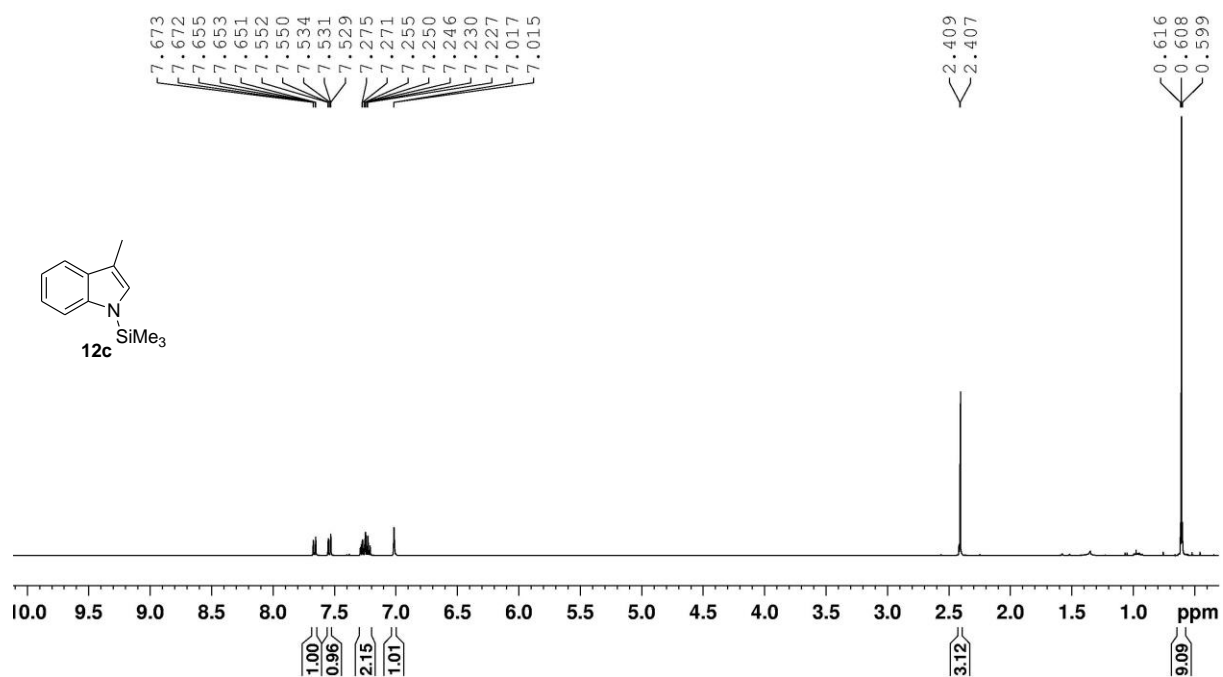

### $^{13}\text{C}$ NMR Spectrum of **12c**

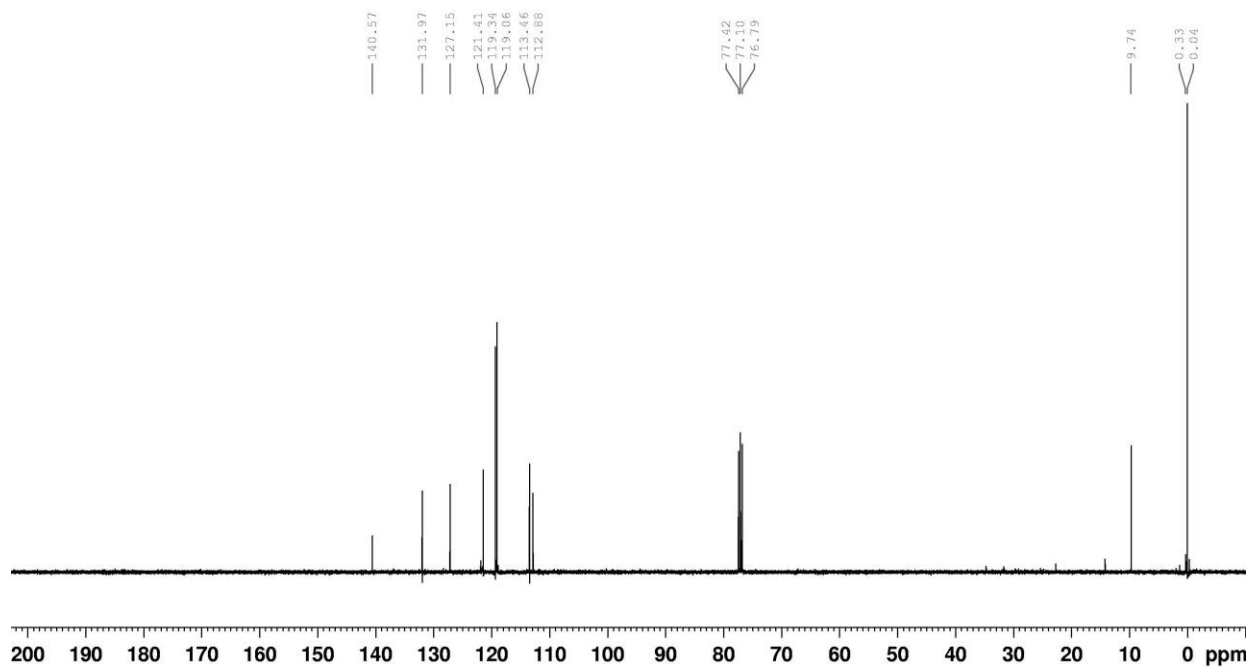

# <sup>1</sup>H NMR Spectrum of 12d

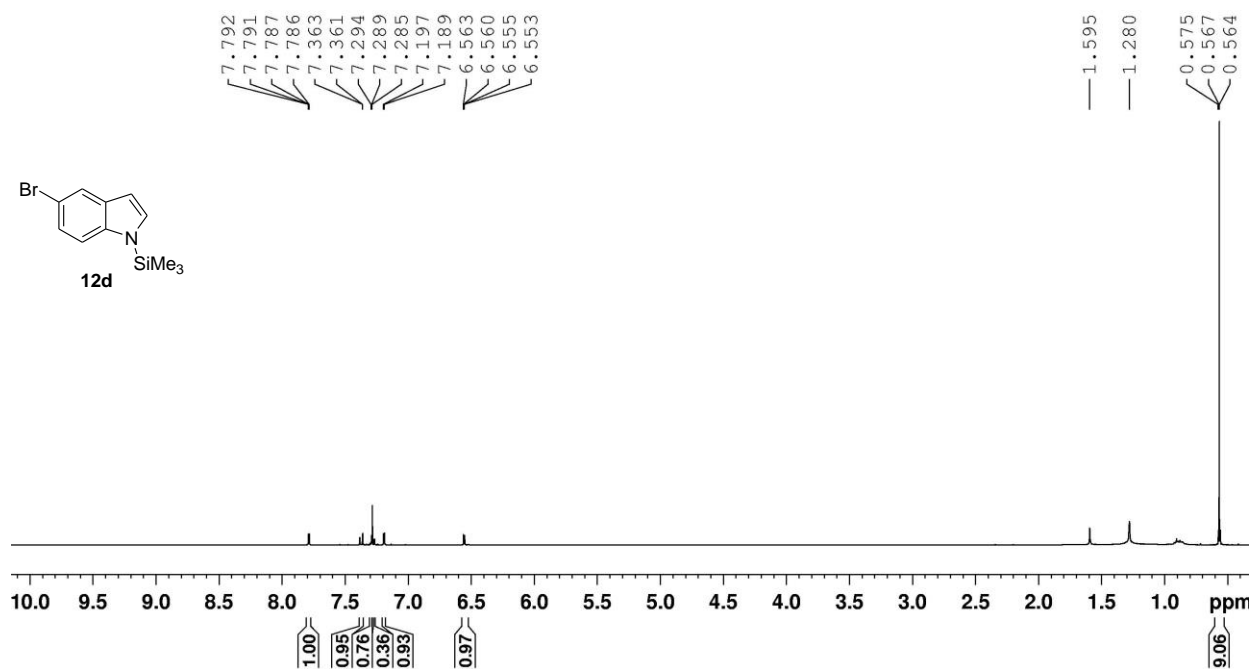

# <sup>13</sup>C NMR Spectrum of 12d

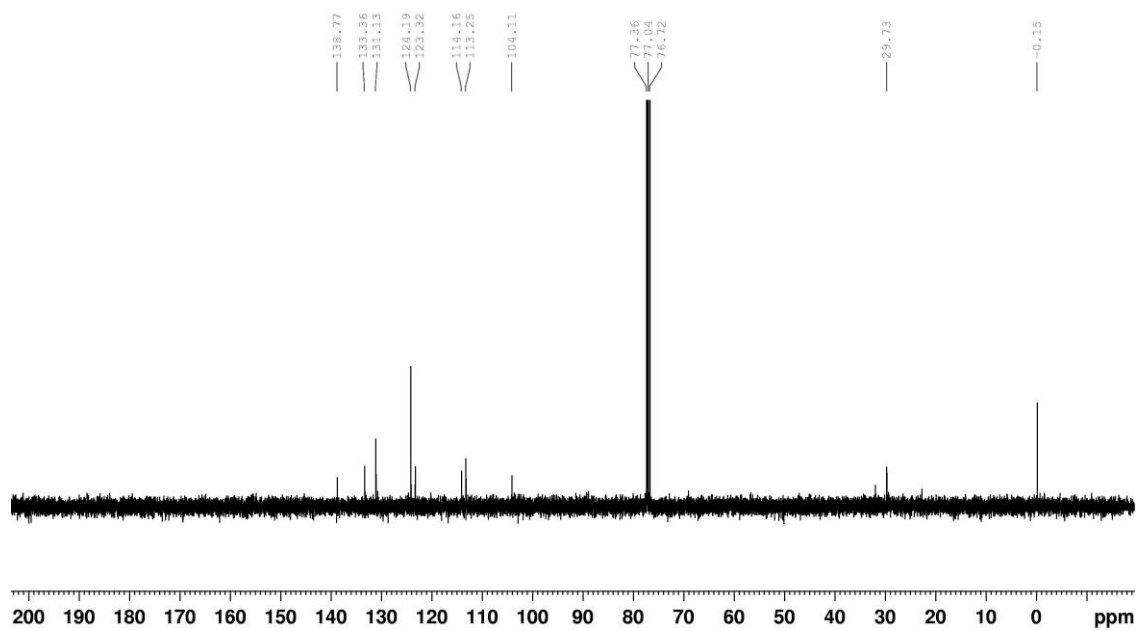

# <sup>1</sup>H NMR Spectrum of 12e

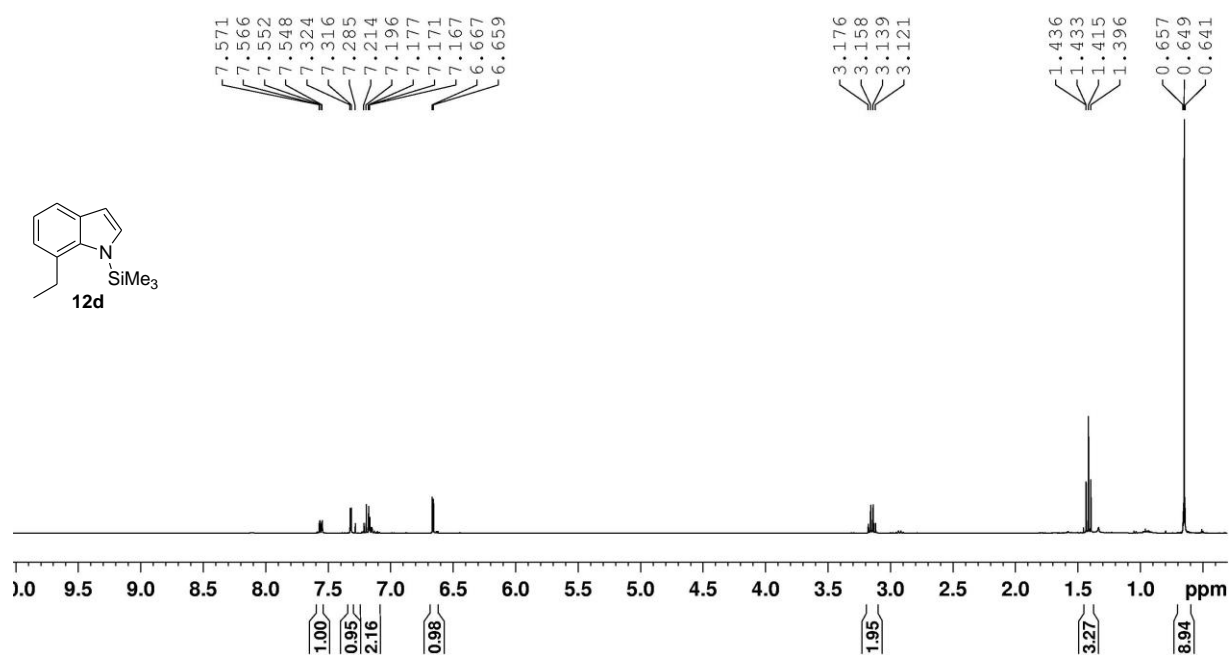

# <sup>13</sup>C NMR Spectrum of 12e

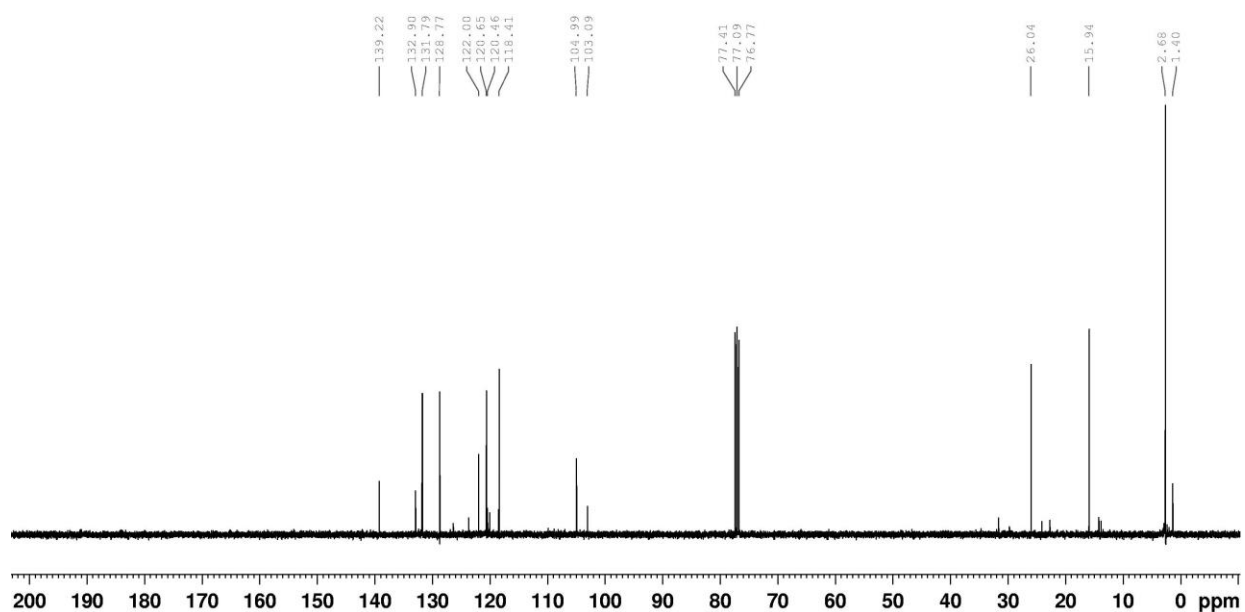

# <sup>1</sup>H NMR Spectrum of **12f**

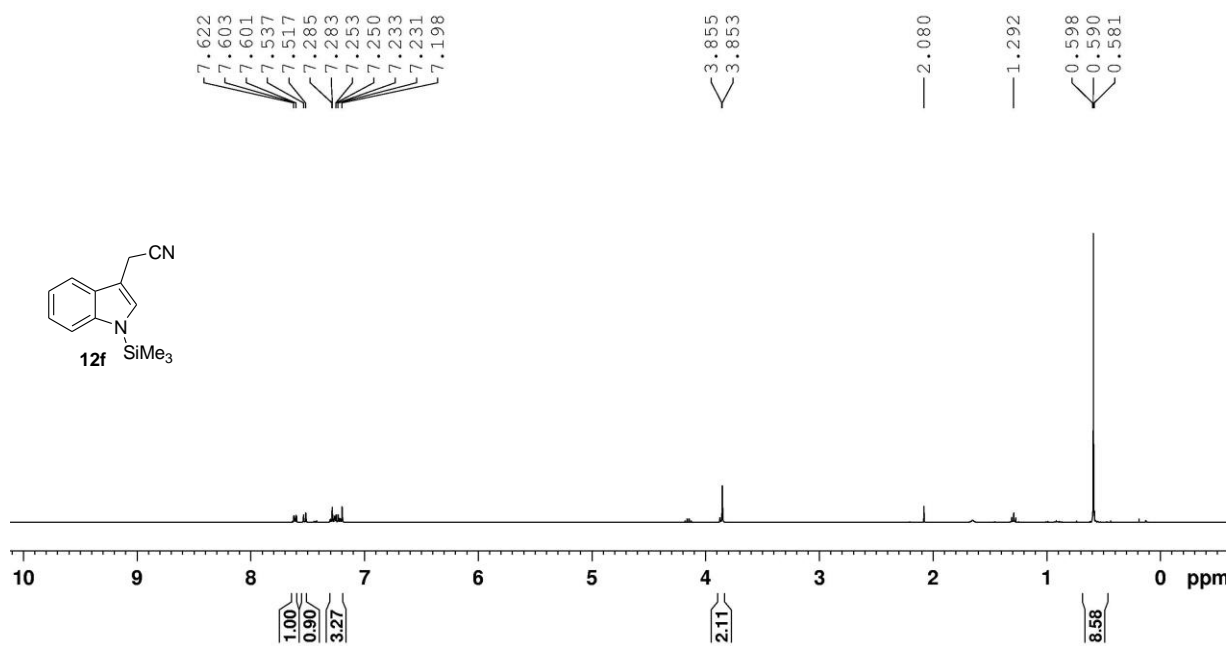

# <sup>13</sup>C NMR Spectrum of **12f**

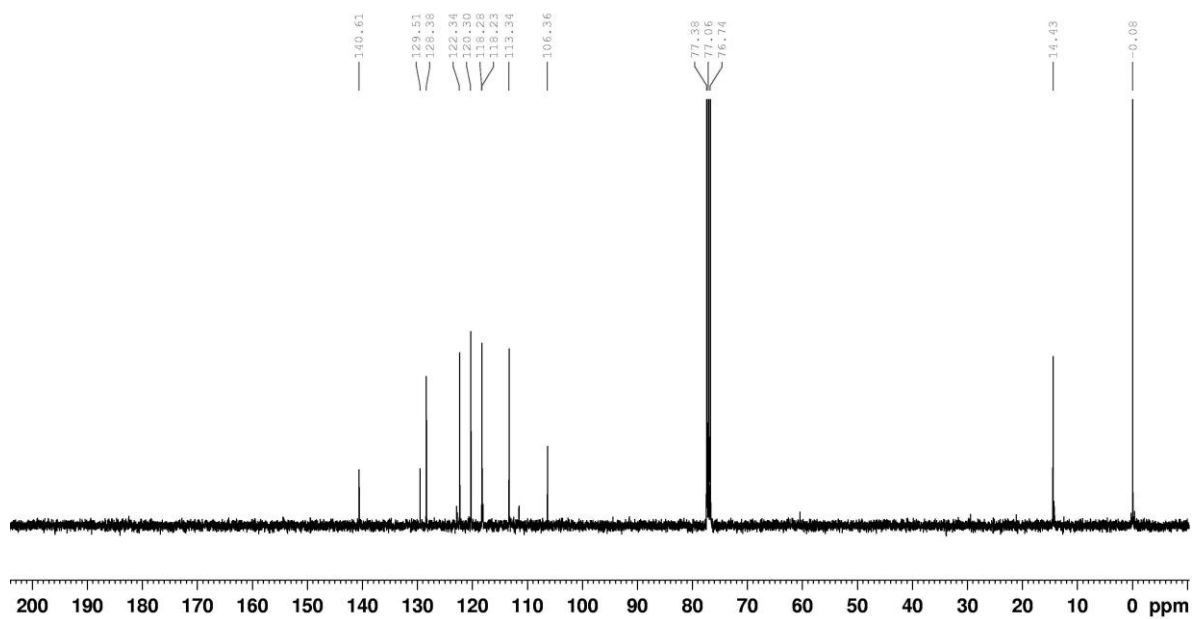

# <sup>1</sup>H NMR Spectrum of **12g**

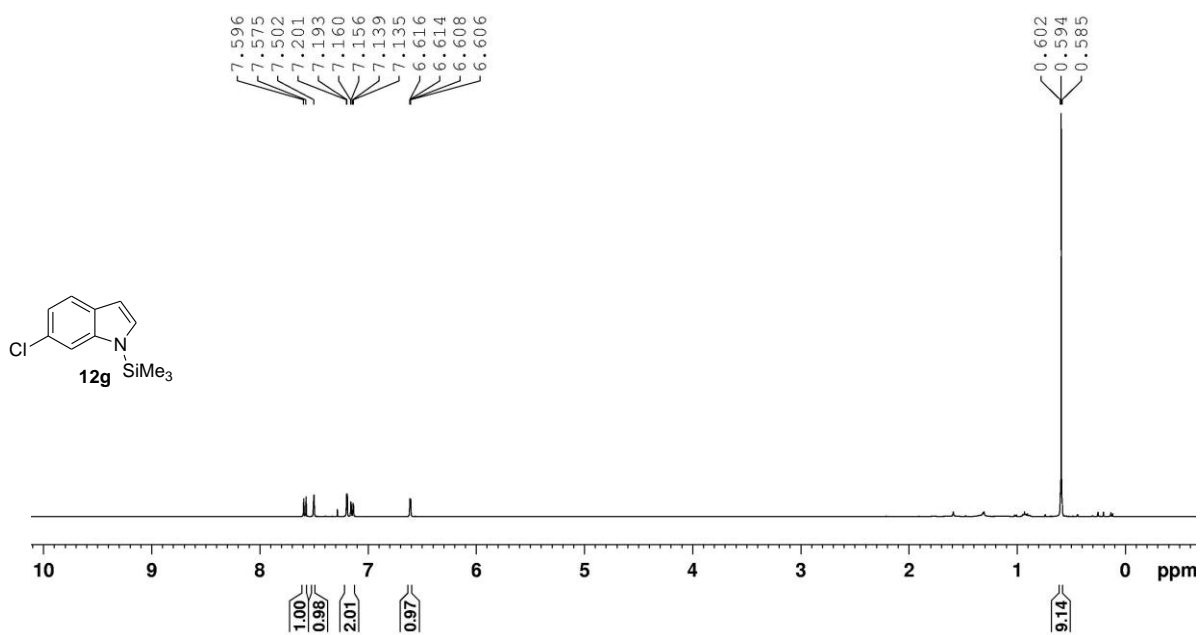

# <sup>13</sup>C NMR Spectrum of **12g**

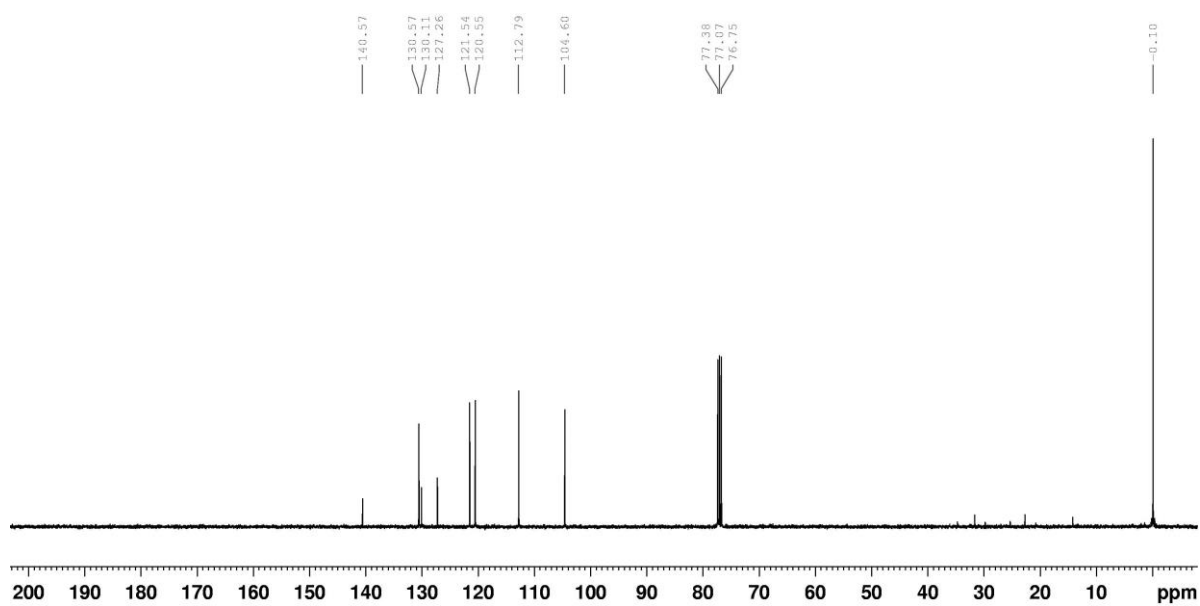

# <sup>1</sup>H NMR Spectrum of **12i**

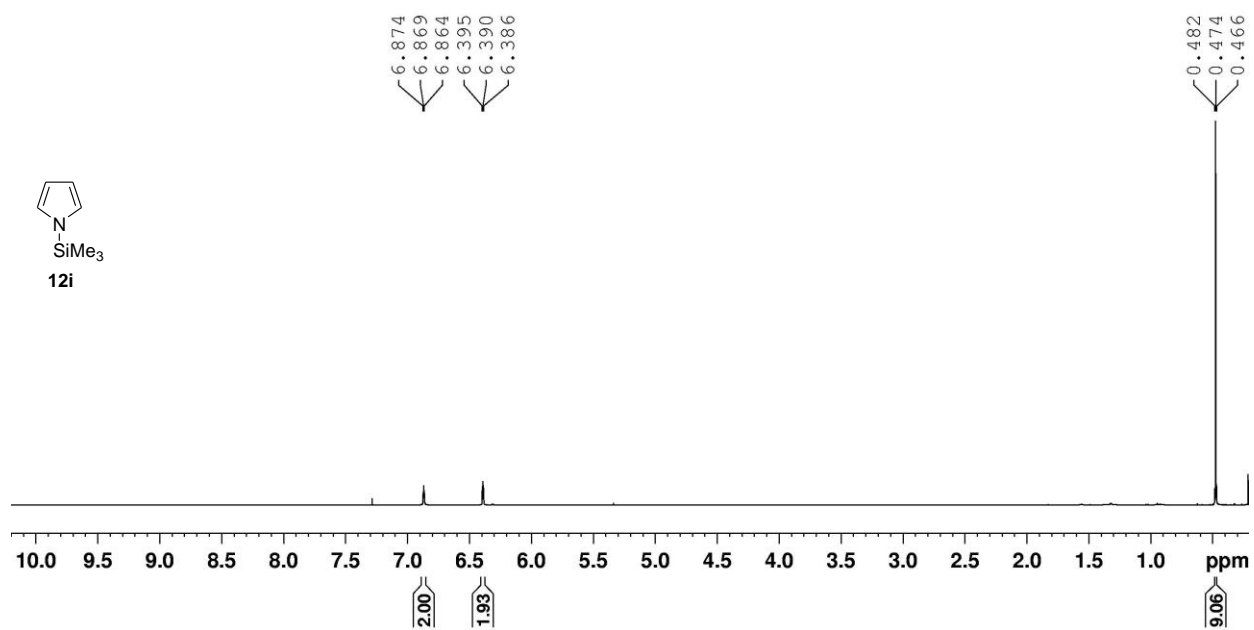

# <sup>13</sup>C NMR Spectrum of **12i**

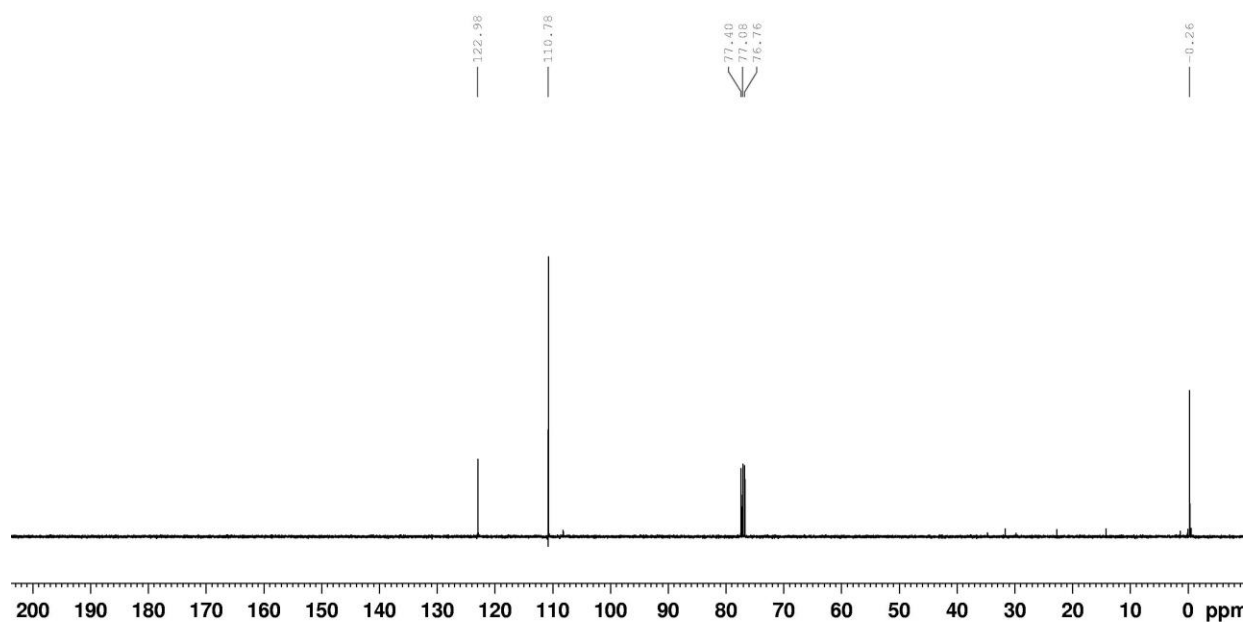

$^{19}\text{F}$  Spectrum the reaction mixture (entry 4 in Table 1)

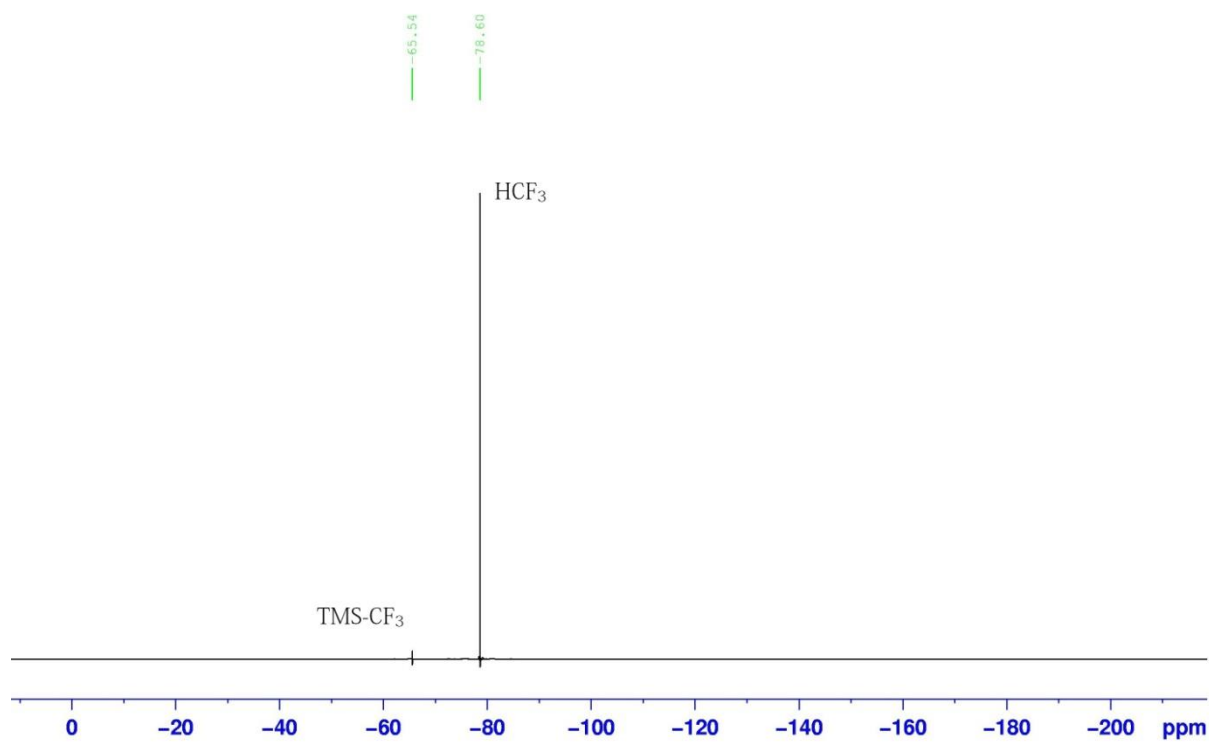

Supplement: c4ra08727e1.pdf [file c4ra08727e1.pdf]
